# Supplementary material for: Experimental investigation of short-term warming on arsenic flux from contaminated sediments of two well-oxygenated subarctic lakes
Source: PLoS One. 2022 Dec 21;17(12):e0279412. doi: 10.1371/journal.pone.0279412 (PMC9770359; doi:10.1371/journal.pone.0279412)
Supplement: S2 File — This file contains element concentrations of overlying water, sediment and porewater generated during the experimental incubation of contaminated lake sediments. (XLSX) [file pone.0279412.s002.xlsx]

## Sheet: Surface Water_Metal(loid)s
Client Name	Taiga Sample ID	Core	Client Sample ID	Sample Type	Sampling Location	Sample Collect Date	Sample Received Date	Test Group Name	Lab Section	Parameter Name	Result Flag	Reported Result	Units	CALC_MDL	Sample Result Qualifier	Analysis Result Qualifier	Analysis Date	Prep Method	Test Method	REPORT STATUS	DL
Aurora Research Institute	190656-001	2.1	C2.1 D=0	Surface Water		2019-06-17	2019-08-06 15:19:00	DICPMS3	Trace Metals, Dissolved	Arsenic		58	µg/L	0.2			2019-08-16 10:46:33		EPA200.8	Final	0.2
Aurora Research Institute	190656-001	2.1	C2.1 D=0	Surface Water		2019-06-17	2019-08-06 15:19:00	DICPMS3	Trace Metals, Dissolved	Iron		33	ug/L	5			2019-08-16 10:46:33		EPA200.8	Final	5
Aurora Research Institute	190656-001	2.1	C2.1 D=0	Surface Water		2019-06-17	2019-08-06 15:19:00	DICPMS3	Trace Metals, Dissolved	Manganese		3.2	µg/L	0.1			2019-08-16 10:46:33		EPA200.8	Final	0.1
Aurora Research Institute	190656-002	2.1	C2.1 Dup D=0	Duplicate		2019-06-17	2019-08-06 15:19:00	DICPMS3	Trace Metals, Dissolved	Arsenic		57.5	µg/L	0.2			2019-08-16 10:48:11		EPA200.8	Final	0.2
Aurora Research Institute	190656-002	2.1	C2.1 Dup D=0	Duplicate		2019-06-17	2019-08-06 15:19:00	DICPMS3	Trace Metals, Dissolved	Iron		35	ug/L	5			2019-08-16 10:48:11		EPA200.8	Final	5
Aurora Research Institute	190656-002	2.1	C2.1 Dup D=0	Duplicate		2019-06-17	2019-08-06 15:19:00	DICPMS3	Trace Metals, Dissolved	Manganese		3.2	µg/L	0.1			2019-08-16 10:48:11		EPA200.8	Final	0.1
Aurora Research Institute	190656-003	2.2	C2.2 D=0	Surface Water		2019-06-17	2019-08-06 15:19:00	DICPMS3	Trace Metals, Dissolved	Arsenic		34.2	µg/L	0.2			2019-08-16 10:59:35		EPA200.8	Final	0.2
Aurora Research Institute	190656-003	2.2	C2.2 D=0	Surface Water		2019-06-17	2019-08-06 15:19:00	DICPMS3	Trace Metals, Dissolved	Iron		36	ug/L	5			2019-08-16 10:59:35		EPA200.8	Final	5
Aurora Research Institute	190656-003	2.2	C2.2 D=0	Surface Water		2019-06-17	2019-08-06 15:19:00	DICPMS3	Trace Metals, Dissolved	Manganese		4.1	µg/L	0.1			2019-08-16 10:59:35		EPA200.8	Final	0.1
Aurora Research Institute	190656-004	2.3	C2.3 D=0	Surface Water		2019-06-17	2019-08-06 15:19:00	DICPMS3	Trace Metals, Dissolved	Arsenic		23.5	µg/L	0.2			2019-08-16 11:01:12		EPA200.8	Final	0.2
Aurora Research Institute	190656-004	2.3	C2.3 D=0	Surface Water		2019-06-17	2019-08-06 15:19:00	DICPMS3	Trace Metals, Dissolved	Iron	<	5	ug/L	5			2019-08-16 11:01:12		EPA200.8	Final	5
Aurora Research Institute	190656-004	2.3	C2.3 D=0	Surface Water		2019-06-17	2019-08-06 15:19:00	DICPMS3	Trace Metals, Dissolved	Manganese		168	µg/L	0.1			2019-08-16 11:01:12		EPA200.8	Final	0.1
Aurora Research Institute	190656-005	2.4	C2.4 D=0	Surface Water		2019-06-17	2019-08-06 15:19:00	DICPMS3	Trace Metals, Dissolved	Arsenic		22.6	µg/L	0.2			2019-08-16 11:02:49		EPA200.8	Final	0.2
Aurora Research Institute	190656-005	2.4	C2.4 D=0	Surface Water		2019-06-17	2019-08-06 15:19:00	DICPMS3	Trace Metals, Dissolved	Iron	<	5	ug/L	5			2019-08-16 11:02:49		EPA200.8	Final	5
Aurora Research Institute	190656-005	2.4	C2.4 D=0	Surface Water		2019-06-17	2019-08-06 15:19:00	DICPMS3	Trace Metals, Dissolved	Manganese		48.6	µg/L	0.1			2019-08-16 11:02:49		EPA200.8	Final	0.1
Aurora Research Institute	190656-106	2.1	C2.1 D=0	Pore Water		2019-06-17	2019-08-06 15:19:00	DICPMS3	Trace Metals, Dissolved	Arsenic		124	µg/L	0.2			2019-08-16 16:00:32		EPA200.8	Final	0.2
Aurora Research Institute	190656-106	2.1	C2.1 D=0	Pore Water		2019-06-17	2019-08-06 15:19:00	DICPMS3	Trace Metals, Dissolved	Iron		78	ug/L	5			2019-08-16 16:00:32		EPA200.8	Final	5
Aurora Research Institute	190656-106	2.1	C2.1 D=0	Pore Water		2019-06-17	2019-08-06 15:19:00	DICPMS3	Trace Metals, Dissolved	Manganese		45.4	µg/L	0.1			2019-08-16 16:00:32		EPA200.8	Final	0.1
Aurora Research Institute	190656-107	2.2	C2.2 D=0	Pore Water		2019-06-17	2019-08-06 15:19:00	DICPMS3	Trace Metals, Dissolved	Arsenic		42.5	µg/L	0.2			2019-08-16 16:11:55		EPA200.8	Final	0.2
Aurora Research Institute	190656-107	2.2	C2.2 D=0	Pore Water		2019-06-17	2019-08-06 15:19:00	DICPMS3	Trace Metals, Dissolved	Iron		463	ug/L	5			2019-08-16 16:11:55		EPA200.8	Final	5
Aurora Research Institute	190656-107	2.2	C2.2 D=0	Pore Water		2019-06-17	2019-08-06 15:19:00	DICPMS3	Trace Metals, Dissolved	Manganese		231	µg/L	0.1			2019-08-16 16:11:55		EPA200.8	Final	0.1
Aurora Research Institute	190656-011	2.1	C2.1 D=1	Surface Water		2019-06-18	2019-08-06 15:19:00	DICPMS3	Trace Metals, Dissolved	Arsenic		56.4	µg/L	0.2			2019-08-16 11:10:56		EPA200.8	Final	0.2
Aurora Research Institute	190656-011	2.1	C2.1 D=1	Surface Water		2019-06-18	2019-08-06 15:19:00	DICPMS3	Trace Metals, Dissolved	Iron		31	ug/L	5			2019-08-16 11:10:56		EPA200.8	Final	5
Aurora Research Institute	190656-011	2.1	C2.1 D=1	Surface Water		2019-06-18	2019-08-06 15:19:00	DICPMS3	Trace Metals, Dissolved	Manganese		2.4	µg/L	0.1			2019-08-16 11:10:56		EPA200.8	Final	0.1
Aurora Research Institute	190656-012	2.2	C2.2 D=1	Surface Water		2019-06-18	2019-08-06 15:19:00	DICPMS3	Trace Metals, Dissolved	Arsenic		33.9	µg/L	0.2			2019-08-16 11:12:34		EPA200.8	Final	0.2
Aurora Research Institute	190656-012	2.2	C2.2 D=1	Surface Water		2019-06-18	2019-08-06 15:19:00	DICPMS3	Trace Metals, Dissolved	Iron		36	ug/L	5			2019-08-16 11:12:34		EPA200.8	Final	5
Aurora Research Institute	190656-012	2.2	C2.2 D=1	Surface Water		2019-06-18	2019-08-06 15:19:00	DICPMS3	Trace Metals, Dissolved	Manganese		3.2	µg/L	0.1			2019-08-16 11:12:34		EPA200.8	Final	0.1
Aurora Research Institute	190656-013	2.3	C2.3 D=1	Surface Water		2019-06-18	2019-08-06 15:19:00	DICPMS3	Trace Metals, Dissolved	Arsenic		25.9	µg/L	0.2			2019-08-16 11:14:13		EPA200.8	Final	0.2
Aurora Research Institute	190656-013	2.3	C2.3 D=1	Surface Water		2019-06-18	2019-08-06 15:19:00	DICPMS3	Trace Metals, Dissolved	Iron	<	5	ug/L	5			2019-08-16 11:14:13		EPA200.8	Final	5
Aurora Research Institute	190656-013	2.3	C2.3 D=1	Surface Water		2019-06-18	2019-08-06 15:19:00	DICPMS3	Trace Metals, Dissolved	Manganese		186	µg/L	0.1			2019-08-16 11:14:13		EPA200.8	Final	0.1
Aurora Research Institute	190656-014	2.4	C2.4 D=1	Surface Water		2019-06-18	2019-08-06 15:19:00	DICPMS3	Trace Metals, Dissolved	Arsenic		23.1	µg/L	0.2			2019-08-16 11:15:50		EPA200.8	Final	0.2
Aurora Research Institute	190656-014	2.4	C2.4 D=1	Surface Water		2019-06-18	2019-08-06 15:19:00	DICPMS3	Trace Metals, Dissolved	Iron	<	5	ug/L	5			2019-08-16 11:15:50		EPA200.8	Final	5
Aurora Research Institute	190656-014	2.4	C2.4 D=1	Surface Water		2019-06-18	2019-08-06 15:19:00	DICPMS3	Trace Metals, Dissolved	Manganese		46.3	µg/L	0.1			2019-08-16 11:15:50		EPA200.8	Final	0.1
Aurora Research Institute	190656-015	Field Blank	Field Blank D=1	Field Blank		2019-06-18	2019-08-06 15:19:00	DICPMS3	Trace Metals, Dissolved	Arsenic	<	0.2	µg/L	0.2			2019-08-16 10:30:16		EPA200.8	Final	0.2
Aurora Research Institute	190656-015	Field Blank	Field Blank D=1	Field Blank		2019-06-18	2019-08-06 15:19:00	DICPMS3	Trace Metals, Dissolved	Iron	<	5	ug/L	5			2019-08-16 10:30:16		EPA200.8	Final	5
Aurora Research Institute	190656-015	Field Blank	Field Blank D=1	Field Blank		2019-06-18	2019-08-06 15:19:00	DICPMS3	Trace Metals, Dissolved	Manganese		0.2	µg/L	0.1			2019-08-16 10:30:16		EPA200.8	Final	0.1
Aurora Research Institute	190656-016	2.1	C2.1 D=2	Surface Water		2019-06-19	2019-08-06 15:19:00	DICPMS3	Trace Metals, Dissolved	Arsenic		62.5	µg/L	0.2			2019-08-16 11:17:28		EPA200.8	Final	0.2
Aurora Research Institute	190656-016	2.1	C2.1 D=2	Surface Water		2019-06-19	2019-08-06 15:19:00	DICPMS3	Trace Metals, Dissolved	Iron		31	ug/L	5			2019-08-16 11:17:28		EPA200.8	Final	5
Aurora Research Institute	190656-016	2.1	C2.1 D=2	Surface Water		2019-06-19	2019-08-06 15:19:00	DICPMS3	Trace Metals, Dissolved	Manganese		2.4	µg/L	0.1			2019-08-16 11:17:28		EPA200.8	Final	0.1
Aurora Research Institute	190656-017	2.2	C2.2 D=2	Surface Water		2019-06-19	2019-08-06 15:19:00	DICPMS3	Trace Metals, Dissolved	Arsenic		34.8	µg/L	0.2			2019-08-16 11:28:51		EPA200.8	Final	0.2
Aurora Research Institute	190656-017	2.2	C2.2 D=2	Surface Water		2019-06-19	2019-08-06 15:19:00	DICPMS3	Trace Metals, Dissolved	Iron		32	ug/L	5			2019-08-16 11:28:51		EPA200.8	Final	5
Aurora Research Institute	190656-017	2.2	C2.2 D=2	Surface Water		2019-06-19	2019-08-06 15:19:00	DICPMS3	Trace Metals, Dissolved	Manganese		3.3	µg/L	0.1			2019-08-16 11:28:51		EPA200.8	Final	0.1
Aurora Research Institute	190656-018	2.3	C2.3 D=2	Surface Water		2019-06-19	2019-08-06 15:19:00	DICPMS3	Trace Metals, Dissolved	Arsenic		33.2	µg/L	0.2			2019-08-16 11:30:29		EPA200.8	Final	0.2
Aurora Research Institute	190656-018	2.3	C2.3 D=2	Surface Water		2019-06-19	2019-08-06 15:19:00	DICPMS3	Trace Metals, Dissolved	Iron	<	5	ug/L	5			2019-08-16 11:30:29		EPA200.8	Final	5
Aurora Research Institute	190656-018	2.3	C2.3 D=2	Surface Water		2019-06-19	2019-08-06 15:19:00	DICPMS3	Trace Metals, Dissolved	Manganese		196	µg/L	0.1			2019-08-16 11:30:29		EPA200.8	Final	0.1
Aurora Research Institute	190656-019	2.4	C2.4 D=2	Surface Water		2019-06-19	2019-08-06 15:19:00	DICPMS3	Trace Metals, Dissolved	Arsenic		28.7	µg/L	0.2			2019-08-16 11:32:06		EPA200.8	Final	0.2
Aurora Research Institute	190656-019	2.4	C2.4 D=2	Surface Water		2019-06-19	2019-08-06 15:19:00	DICPMS3	Trace Metals, Dissolved	Iron	<	5	ug/L	5			2019-08-16 11:32:06		EPA200.8	Final	5
Aurora Research Institute	190656-019	2.4	C2.4 D=2	Surface Water		2019-06-19	2019-08-06 15:19:00	DICPMS3	Trace Metals, Dissolved	Manganese		46.5	µg/L	0.1			2019-08-16 11:32:06		EPA200.8	Final	0.1
Aurora Research Institute	190656-020	Field Blank	Field Blank D=2	Field Blank		2019-06-19	2019-08-06 15:19:00	DICPMS3	Trace Metals, Dissolved	Arsenic	<	0.2	µg/L	0.2			2019-08-16 10:31:54		EPA200.8	Final	0.2
Aurora Research Institute	190656-020	Field Blank	Field Blank D=2	Field Blank		2019-06-19	2019-08-06 15:19:00	DICPMS3	Trace Metals, Dissolved	Iron	<	5	ug/L	5			2019-08-16 10:31:54		EPA200.8	Final	5
Aurora Research Institute	190656-020	Field Blank	Field Blank D=2	Field Blank		2019-06-19	2019-08-06 15:19:00	DICPMS3	Trace Metals, Dissolved	Manganese	<	0.1	µg/L	0.1			2019-08-16 10:31:54		EPA200.8	Final	0.1
Aurora Research Institute	190656-021	2.1	C2.1 D=4	Surface Water		2019-06-21	2019-08-06 15:19:00	DICPMS3	Trace Metals, Dissolved	Arsenic		65.7	µg/L	0.2			2019-08-16 11:33:43		EPA200.8	Final	0.2
Aurora Research Institute	190656-021	2.1	C2.1 D=4	Surface Water		2019-06-21	2019-08-06 15:19:00	DICPMS3	Trace Metals, Dissolved	Iron		36	ug/L	5			2019-08-16 11:33:43		EPA200.8	Final	5
Aurora Research Institute	190656-021	2.1	C2.1 D=4	Surface Water		2019-06-21	2019-08-06 15:19:00	DICPMS3	Trace Metals, Dissolved	Manganese		1.7	µg/L	0.1			2019-08-16 11:33:43		EPA200.8	Final	0.1
Aurora Research Institute	190656-022	2.2	C2.2 D=4	Surface Water		2019-06-21	2019-08-06 15:19:00	DICPMS3	Trace Metals, Dissolved	Arsenic		35.2	µg/L	0.2			2019-08-16 11:35:21		EPA200.8	Final	0.2
Aurora Research Institute	190656-022	2.2	C2.2 D=4	Surface Water		2019-06-21	2019-08-06 15:19:00	DICPMS3	Trace Metals, Dissolved	Iron		28	ug/L	5			2019-08-16 11:35:21		EPA200.8	Final	5
Aurora Research Institute	190656-022	2.2	C2.2 D=4	Surface Water		2019-06-21	2019-08-06 15:19:00	DICPMS3	Trace Metals, Dissolved	Manganese		3.5	µg/L	0.1			2019-08-16 11:35:21		EPA200.8	Final	0.1
Aurora Research Institute	190656-023	2.2	C2.2 D=4 DUP	Duplicate		2019-06-21	2019-08-06 15:19:00	DICPMS3	Trace Metals, Dissolved	Arsenic		34.9	µg/L	0.2			2019-08-16 11:36:58		EPA200.8	Final	0.2
Aurora Research Institute	190656-023	2.2	C2.2 D=4 DUP	Duplicate		2019-06-21	2019-08-06 15:19:00	DICPMS3	Trace Metals, Dissolved	Iron		28	ug/L	5			2019-08-16 11:36:58		EPA200.8	Final	5
Aurora Research Institute	190656-023	2.2	C2.2 D=4 DUP	Duplicate		2019-06-21	2019-08-06 15:19:00	DICPMS3	Trace Metals, Dissolved	Manganese		3.5	µg/L	0.1			2019-08-16 11:36:58		EPA200.8	Final	0.1
Aurora Research Institute	190656-024	2.3	C2.3 D=4	Surface Water		2019-06-21	2019-08-06 15:19:00	DICPMS3	Trace Metals, Dissolved	Arsenic		44.2	µg/L	0.2			2019-08-16 11:38:36		EPA200.8	Final	0.2
Aurora Research Institute	190656-024	2.3	C2.3 D=4	Surface Water		2019-06-21	2019-08-06 15:19:00	DICPMS3	Trace Metals, Dissolved	Iron	<	5	ug/L	5			2019-08-16 11:38:36		EPA200.8	Final	5
Aurora Research Institute	190656-024	2.3	C2.3 D=4	Surface Water		2019-06-21	2019-08-06 15:19:00	DICPMS3	Trace Metals, Dissolved	Manganese		204	µg/L	0.1			2019-08-16 11:38:36		EPA200.8	Final	0.1
Aurora Research Institute	190656-025	2.4	C2.4 D=4	Surface Water		2019-06-21	2019-08-06 15:19:00	DICPMS3	Trace Metals, Dissolved	Arsenic		37.1	µg/L	0.2			2019-08-16 11:40:13		EPA200.8	Final	0.2
Aurora Research Institute	190656-025	2.4	C2.4 D=4	Surface Water		2019-06-21	2019-08-06 15:19:00	DICPMS3	Trace Metals, Dissolved	Iron	<	5	ug/L	5			2019-08-16 11:40:13		EPA200.8	Final	5
Aurora Research Institute	190656-025	2.4	C2.4 D=4	Surface Water		2019-06-21	2019-08-06 15:19:00	DICPMS3	Trace Metals, Dissolved	Manganese		42.9	µg/L	0.1			2019-08-16 11:40:13		EPA200.8	Final	0.1
Aurora Research Institute	190656-026	2.1	C2.1 D=7	Surface Water		2019-06-24	2019-08-06 15:19:00	DICPMS3	Trace Metals, Dissolved	Arsenic		66.7	µg/L	0.2			2019-08-16 11:41:51		EPA200.8	Final	0.2
Aurora Research Institute	190656-026	2.1	C2.1 D=7	Surface Water		2019-06-24	2019-08-06 15:19:00	DICPMS3	Trace Metals, Dissolved	Iron		26	ug/L	5			2019-08-16 11:41:51		EPA200.8	Final	5
Aurora Research Institute	190656-026	2.1	C2.1 D=7	Surface Water		2019-06-24	2019-08-06 15:19:00	DICPMS3	Trace Metals, Dissolved	Manganese		1.1	µg/L	0.1			2019-08-16 11:41:51		EPA200.8	Final	0.1
Aurora Research Institute	190656-027	2.2	C2.2 D=7	Surface Water		2019-06-24	2019-08-06 15:19:00	DICPMS3	Trace Metals, Dissolved	Arsenic		36.7	µg/L	0.2			2019-08-16 11:43:29		EPA200.8	Final	0.2
Aurora Research Institute	190656-027	2.2	C2.2 D=7	Surface Water		2019-06-24	2019-08-06 15:19:00	DICPMS3	Trace Metals, Dissolved	Iron		18	ug/L	5			2019-08-16 11:43:29		EPA200.8	Final	5
Aurora Research Institute	190656-027	2.2	C2.2 D=7	Surface Water		2019-06-24	2019-08-06 15:19:00	DICPMS3	Trace Metals, Dissolved	Manganese		0.2	µg/L	0.1			2019-08-16 11:43:29		EPA200.8	Final	0.1
Aurora Research Institute	190656-028	2.3	C2.3 D=7	Surface Water		2019-06-24	2019-08-06 15:19:00	DICPMS3	Trace Metals, Dissolved	Arsenic		54.6	µg/L	0.2			2019-08-16 11:45:07		EPA200.8	Final	0.2
Aurora Research Institute	190656-028	2.3	C2.3 D=7	Surface Water		2019-06-24	2019-08-06 15:19:00	DICPMS3	Trace Metals, Dissolved	Iron	<	5	ug/L	5			2019-08-16 11:45:07		EPA200.8	Final	5
Aurora Research Institute	190656-028	2.3	C2.3 D=7	Surface Water		2019-06-24	2019-08-06 15:19:00	DICPMS3	Trace Metals, Dissolved	Manganese		212	µg/L	0.1			2019-08-16 11:45:07		EPA200.8	Final	0.1
Aurora Research Institute	190656-029	2.4	C2.4 D=7	Surface Water		2019-06-24	2019-08-06 15:19:00	DICPMS3	Trace Metals, Dissolved	Arsenic		45.4	µg/L	0.2			2019-08-16 11:46:44		EPA200.8	Final	0.2
Aurora Research Institute	190656-029	2.4	C2.4 D=7	Surface Water		2019-06-24	2019-08-06 15:19:00	DICPMS3	Trace Metals, Dissolved	Iron	<	5	ug/L	5			2019-08-16 11:46:44		EPA200.8	Final	5
Aurora Research Institute	190656-029	2.4	C2.4 D=7	Surface Water		2019-06-24	2019-08-06 15:19:00	DICPMS3	Trace Metals, Dissolved	Manganese		35.9	µg/L	0.1			2019-08-16 11:46:44		EPA200.8	Final	0.1
Aurora Research Institute	190656-030	Field Blank	Field Blank D=7	Field Blank		2019-06-24	2019-08-06 15:19:00	DICPMS3	Trace Metals, Dissolved	Arsenic	<	0.2	µg/L	0.2			2019-08-16 10:33:32		EPA200.8	Final	0.2
Aurora Research Institute	190656-030	Field Blank	Field Blank D=7	Field Blank		2019-06-24	2019-08-06 15:19:00	DICPMS3	Trace Metals, Dissolved	Iron	<	5	ug/L	5			2019-08-16 10:33:32		EPA200.8	Final	5
Aurora Research Institute	190656-030	Field Blank	Field Blank D=7	Field Blank		2019-06-24	2019-08-06 15:19:00	DICPMS3	Trace Metals, Dissolved	Manganese		0.3	µg/L	0.1			2019-08-16 10:33:32		EPA200.8	Final	0.1
Aurora Research Institute	190656-108	2.1	C2.1 D=7	Pore Water		2019-06-24	2019-08-06 15:19:00	DICPMS3	Trace Metals, Dissolved	Arsenic		101	µg/L	0.2			2019-08-16 16:13:32		EPA200.8	Final	0.2
Aurora Research Institute	190656-108	2.1	C2.1 D=7	Pore Water		2019-06-24	2019-08-06 15:19:00	DICPMS3	Trace Metals, Dissolved	Iron		23	ug/L	5			2019-08-16 16:13:32		EPA200.8	Final	5
Aurora Research Institute	190656-108	2.1	C2.1 D=7	Pore Water		2019-06-24	2019-08-06 15:19:00	DICPMS3	Trace Metals, Dissolved	Manganese		4	µg/L	0.1			2019-08-16 16:13:32		EPA200.8	Final	0.1
Aurora Research Institute	190656-109	2.2	C2.2 D=7	Pore Water		2019-06-24	2019-08-06 15:19:00	DICPMS3	Trace Metals, Dissolved	Arsenic		32.3	µg/L	0.2			2019-08-16 16:15:10		EPA200.8	Final	0.2
Aurora Research Institute	190656-109	2.2	C2.2 D=7	Pore Water		2019-06-24	2019-08-06 15:19:00	DICPMS3	Trace Metals, Dissolved	Iron		396	ug/L	5			2019-08-16 16:15:10		EPA200.8	Final	5
Aurora Research Institute	190656-109	2.2	C2.2 D=7	Pore Water		2019-06-24	2019-08-06 15:19:00	DICPMS3	Trace Metals, Dissolved	Manganese		177	µg/L	0.1			2019-08-16 16:15:10		EPA200.8	Final	0.1
Aurora Research Institute	190656-031	2.1	C2.1 D=8	Surface Water		2019-06-25	2019-08-06 15:19:00	DICPMS3	Trace Metals, Dissolved	Arsenic		72.4	µg/L	0.2			2019-08-16 11:58:07		EPA200.8	Final	0.2
Aurora Research Institute	190656-031	2.1	C2.1 D=8	Surface Water		2019-06-25	2019-08-06 15:19:00	DICPMS3	Trace Metals, Dissolved	Iron		31	ug/L	5			2019-08-16 11:58:07		EPA200.8	Final	5
Aurora Research Institute	190656-031	2.1	C2.1 D=8	Surface Water		2019-06-25	2019-08-06 15:19:00	DICPMS3	Trace Metals, Dissolved	Manganese		2	µg/L	0.1			2019-08-16 11:58:07		EPA200.8	Final	0.1
Aurora Research Institute	190656-032	2.2	C2.2 D=8	Surface Water		2019-06-25	2019-08-06 15:19:00	DICPMS3	Trace Metals, Dissolved	Arsenic		36.4	µg/L	0.2			2019-08-16 11:59:45		EPA200.8	Final	0.2
Aurora Research Institute	190656-032	2.2	C2.2 D=8	Surface Water		2019-06-25	2019-08-06 15:19:00	DICPMS3	Trace Metals, Dissolved	Iron		17	ug/L	5			2019-08-16 11:59:45		EPA200.8	Final	5
Aurora Research Institute	190656-032	2.2	C2.2 D=8	Surface Water		2019-06-25	2019-08-06 15:19:00	DICPMS3	Trace Metals, Dissolved	Manganese		0.8	µg/L	0.1			2019-08-16 11:59:45		EPA200.8	Final	0.1
Aurora Research Institute	190656-033	2.3	C2.3 D=8	Surface Water		2019-06-25	2019-08-06 15:19:00	DICPMS3	Trace Metals, Dissolved	Arsenic		55.8	µg/L	0.2			2019-08-16 12:01:23		EPA200.8	Final	0.2
Aurora Research Institute	190656-033	2.3	C2.3 D=8	Surface Water		2019-06-25	2019-08-06 15:19:00	DICPMS3	Trace Metals, Dissolved	Iron	<	5	ug/L	5			2019-08-16 12:01:23		EPA200.8	Final	5
Aurora Research Institute	190656-033	2.3	C2.3 D=8	Surface Water		2019-06-25	2019-08-06 15:19:00	DICPMS3	Trace Metals, Dissolved	Manganese		199	µg/L	0.1			2019-08-16 12:01:23		EPA200.8	Final	0.1
Aurora Research Institute	190656-034	2.4	C2.4 D=8	Surface Water		2019-06-25	2019-08-06 15:19:00	DICPMS3	Trace Metals, Dissolved	Arsenic		46.9	µg/L	0.2			2019-08-16 12:02:59		EPA200.8	Final	0.2
Aurora Research Institute	190656-034	2.4	C2.4 D=8	Surface Water		2019-06-25	2019-08-06 15:19:00	DICPMS3	Trace Metals, Dissolved	Iron	<	5	ug/L	5			2019-08-16 12:02:59		EPA200.8	Final	5
Aurora Research Institute	190656-034	2.4	C2.4 D=8	Surface Water		2019-06-25	2019-08-06 15:19:00	DICPMS3	Trace Metals, Dissolved	Manganese		31.5	µg/L	0.1			2019-08-16 12:02:59		EPA200.8	Final	0.1
Aurora Research Institute	190656-035	Travel Blank	Travel Blank D=8	Travel Blank		2019-06-25	2019-08-06 15:19:00	DICPMS3	Trace Metals, Dissolved	Arsenic	<	0.2	µg/L	0.2			2019-08-16 10:35:10		EPA200.8	Final	0.2
Aurora Research Institute	190656-035	Travel Blank	Travel Blank D=8	Travel Blank		2019-06-25	2019-08-06 15:19:00	DICPMS3	Trace Metals, Dissolved	Iron	<	5	ug/L	5			2019-08-16 10:35:10		EPA200.8	Final	5
Aurora Research Institute	190656-035	Travel Blank	Travel Blank D=8	Travel Blank		2019-06-25	2019-08-06 15:19:00	DICPMS3	Trace Metals, Dissolved	Manganese	<	0.1	µg/L	0.1			2019-08-16 10:35:10		EPA200.8	Final	0.1
Aurora Research Institute	190656-036	2.1	C2.1 D=9	Surface Water		2019-06-26	2019-08-06 15:19:00	DICPMS3	Trace Metals, Dissolved	Arsenic		74.4	µg/L	0.2			2019-08-16 12:04:36		EPA200.8	Final	0.2
Aurora Research Institute	190656-036	2.1	C2.1 D=9	Surface Water		2019-06-26	2019-08-06 15:19:00	DICPMS3	Trace Metals, Dissolved	Iron		29	ug/L	5			2019-08-16 12:04:36		EPA200.8	Final	5
Aurora Research Institute	190656-036	2.1	C2.1 D=9	Surface Water		2019-06-26	2019-08-06 15:19:00	DICPMS3	Trace Metals, Dissolved	Manganese		1.4	µg/L	0.1			2019-08-16 12:04:36		EPA200.8	Final	0.1
Aurora Research Institute	190656-037	2.2	C2.2 D=9	Surface Water		2019-06-26	2019-08-06 15:19:00	DICPMS3	Trace Metals, Dissolved	Arsenic		37.5	µg/L	0.2			2019-08-16 12:06:14		EPA200.8	Final	0.2
Aurora Research Institute	190656-037	2.2	C2.2 D=9	Surface Water		2019-06-26	2019-08-06 15:19:00	DICPMS3	Trace Metals, Dissolved	Iron		16	ug/L	5			2019-08-16 12:06:14		EPA200.8	Final	5
Aurora Research Institute	190656-037	2.2	C2.2 D=9	Surface Water		2019-06-26	2019-08-06 15:19:00	DICPMS3	Trace Metals, Dissolved	Manganese		0.5	µg/L	0.1			2019-08-16 12:06:14		EPA200.8	Final	0.1
Aurora Research Institute	190656-038	2.3	C2.3 D=9	Surface Water		2019-06-26	2019-08-06 15:19:00	DICPMS3	Trace Metals, Dissolved	Arsenic		58.3	µg/L	0.2			2019-08-16 12:07:52		EPA200.8	Final	0.2
Aurora Research Institute	190656-038	2.3	C2.3 D=9	Surface Water		2019-06-26	2019-08-06 15:19:00	DICPMS3	Trace Metals, Dissolved	Iron		7	ug/L	5			2019-08-16 12:07:52		EPA200.8	Final	5
Aurora Research Institute	190656-038	2.3	C2.3 D=9	Surface Water		2019-06-26	2019-08-06 15:19:00	DICPMS3	Trace Metals, Dissolved	Manganese		195	µg/L	0.1			2019-08-16 12:07:52		EPA200.8	Final	0.1
Aurora Research Institute	190656-039	2.3	C2.3 Dup D=9	Duplicate		2019-06-26	2019-08-06 15:19:00	DICPMS3	Trace Metals, Dissolved	Arsenic		59.9	µg/L	0.2			2019-08-16 12:09:28		EPA200.8	Final	0.2
Aurora Research Institute	190656-039	2.3	C2.3 Dup D=9	Duplicate		2019-06-26	2019-08-06 15:19:00	DICPMS3	Trace Metals, Dissolved	Iron	<	5	ug/L	5			2019-08-16 12:09:28		EPA200.8	Final	5
Aurora Research Institute	190656-039	2.3	C2.3 Dup D=9	Duplicate		2019-06-26	2019-08-06 15:19:00	DICPMS3	Trace Metals, Dissolved	Manganese		203	µg/L	0.1			2019-08-16 12:09:28		EPA200.8	Final	0.1
Aurora Research Institute	190656-040	2.4	C2.4 D=9	Surface Water		2019-06-26	2019-08-06 15:19:00	DICPMS3	Trace Metals, Dissolved	Arsenic		48.6	µg/L	0.2			2019-08-16 12:11:05		EPA200.8	Final	0.2
Aurora Research Institute	190656-040	2.4	C2.4 D=9	Surface Water		2019-06-26	2019-08-06 15:19:00	DICPMS3	Trace Metals, Dissolved	Iron	<	5	ug/L	5			2019-08-16 12:11:05		EPA200.8	Final	5
Aurora Research Institute	190656-040	2.4	C2.4 D=9	Surface Water		2019-06-26	2019-08-06 15:19:00	DICPMS3	Trace Metals, Dissolved	Manganese		28.8	µg/L	0.1			2019-08-16 12:11:05		EPA200.8	Final	0.1
Aurora Research Institute	190656-041	2.1	C2.1 D=11	Surface Water		2019-06-28	2019-08-06 15:19:00	DICPMS3	Trace Metals, Dissolved	Arsenic		77.9	µg/L	0.2			2019-08-16 12:12:42		EPA200.8	Final	0.2
Aurora Research Institute	190656-041	2.1	C2.1 D=11	Surface Water		2019-06-28	2019-08-06 15:19:00	DICPMS3	Trace Metals, Dissolved	Iron		27	ug/L	5			2019-08-16 12:12:42		EPA200.8	Final	5
Aurora Research Institute	190656-041	2.1	C2.1 D=11	Surface Water		2019-06-28	2019-08-06 15:19:00	DICPMS3	Trace Metals, Dissolved	Manganese		0.9	µg/L	0.1			2019-08-16 12:12:42		EPA200.8	Final	0.1
Aurora Research Institute	190656-042	2.2	C2.2 D=11	Surface Water		2019-06-28	2019-08-06 15:19:00	DICPMS3	Trace Metals, Dissolved	Arsenic		38	µg/L	0.2			2019-08-16 12:14:20		EPA200.8	Final	0.2
Aurora Research Institute	190656-042	2.2	C2.2 D=11	Surface Water		2019-06-28	2019-08-06 15:19:00	DICPMS3	Trace Metals, Dissolved	Iron		15	ug/L	5			2019-08-16 12:14:20		EPA200.8	Final	5
Aurora Research Institute	190656-042	2.2	C2.2 D=11	Surface Water		2019-06-28	2019-08-06 15:19:00	DICPMS3	Trace Metals, Dissolved	Manganese		0.5	µg/L	0.1			2019-08-16 12:14:20		EPA200.8	Final	0.1
Aurora Research Institute	190656-043	2.3	C2.3 D=11	Surface Water		2019-06-28	2019-08-06 15:19:00	DICPMS3	Trace Metals, Dissolved	Arsenic		61.5	µg/L	0.2			2019-08-16 12:15:58		EPA200.8	Final	0.2
Aurora Research Institute	190656-043	2.3	C2.3 D=11	Surface Water		2019-06-28	2019-08-06 15:19:00	DICPMS3	Trace Metals, Dissolved	Iron	<	5	ug/L	5			2019-08-16 12:15:58		EPA200.8	Final	5
Aurora Research Institute	190656-043	2.3	C2.3 D=11	Surface Water		2019-06-28	2019-08-06 15:19:00	DICPMS3	Trace Metals, Dissolved	Manganese		175	µg/L	0.1			2019-08-16 12:15:58		EPA200.8	Final	0.1
Aurora Research Institute	190656-044	2.4	C2.4 D=11	Surface Water		2019-06-28	2019-08-06 15:19:00	DICPMS3	Trace Metals, Dissolved	Arsenic		51.1	µg/L	0.2			2019-08-16 12:27:21		EPA200.8	Final	0.2
Aurora Research Institute	190656-044	2.4	C2.4 D=11	Surface Water		2019-06-28	2019-08-06 15:19:00	DICPMS3	Trace Metals, Dissolved	Iron	<	5	ug/L	5			2019-08-16 12:27:21		EPA200.8	Final	5
Aurora Research Institute	190656-044	2.4	C2.4 D=11	Surface Water		2019-06-28	2019-08-06 15:19:00	DICPMS3	Trace Metals, Dissolved	Manganese		23.1	µg/L	0.1			2019-08-16 12:27:21		EPA200.8	Final	0.1
Aurora Research Institute	190656-045	Field Blank	Field Blank D=11	Field Blank		2019-06-28	2019-08-06 15:19:00	DICPMS3	Trace Metals, Dissolved	Arsenic	<	0.2	µg/L	0.2			2019-08-16 10:36:47		EPA200.8	Final	0.2
Aurora Research Institute	190656-045	Field Blank	Field Blank D=11	Field Blank		2019-06-28	2019-08-06 15:19:00	DICPMS3	Trace Metals, Dissolved	Iron	<	5	ug/L	5			2019-08-16 10:36:47		EPA200.8	Final	5
Aurora Research Institute	190656-045	Field Blank	Field Blank D=11	Field Blank		2019-06-28	2019-08-06 15:19:00	DICPMS3	Trace Metals, Dissolved	Manganese		0.2	µg/L	0.1			2019-08-16 10:36:47		EPA200.8	Final	0.1
Aurora Research Institute	190656-046	2.1	C2.1 D=15	Surface Water		2019-07-02	2019-08-06 15:19:00	DICPMS3	Trace Metals, Dissolved	Arsenic		85	µg/L	0.2			2019-08-16 12:28:57		EPA200.8	Final	0.2
Aurora Research Institute	190656-046	2.1	C2.1 D=15	Surface Water		2019-07-02	2019-08-06 15:19:00	DICPMS3	Trace Metals, Dissolved	Iron		22	ug/L	5			2019-08-16 12:28:57		EPA200.8	Final	5
Aurora Research Institute	190656-046	2.1	C2.1 D=15	Surface Water		2019-07-02	2019-08-06 15:19:00	DICPMS3	Trace Metals, Dissolved	Manganese		0.8	µg/L	0.1			2019-08-16 12:28:57		EPA200.8	Final	0.1
Aurora Research Institute	190656-047	2.2	C2.2 D=15	Surface Water		2019-07-02	2019-08-06 15:19:00	DICPMS3	Trace Metals, Dissolved	Arsenic		41.8	µg/L	0.2			2019-08-16 12:30:36		EPA200.8	Final	0.2
Aurora Research Institute	190656-047	2.2	C2.2 D=15	Surface Water		2019-07-02	2019-08-06 15:19:00	DICPMS3	Trace Metals, Dissolved	Iron		13	ug/L	5			2019-08-16 12:30:36		EPA200.8	Final	5
Aurora Research Institute	190656-047	2.2	C2.2 D=15	Surface Water		2019-07-02	2019-08-06 15:19:00	DICPMS3	Trace Metals, Dissolved	Manganese		0.5	µg/L	0.1			2019-08-16 12:30:36		EPA200.8	Final	0.1
Aurora Research Institute	190656-048	2.3	C2.3 D=15	Surface Water		2019-07-02	2019-08-06 15:19:00	DICPMS3	Trace Metals, Dissolved	Arsenic		68.7	µg/L	0.2			2019-08-16 12:32:13		EPA200.8	Final	0.2
Aurora Research Institute	190656-048	2.3	C2.3 D=15	Surface Water		2019-07-02	2019-08-06 15:19:00	DICPMS3	Trace Metals, Dissolved	Iron	<	5	ug/L	5			2019-08-16 12:32:13		EPA200.8	Final	5
Aurora Research Institute	190656-048	2.3	C2.3 D=15	Surface Water		2019-07-02	2019-08-06 15:19:00	DICPMS3	Trace Metals, Dissolved	Manganese		139	µg/L	0.1			2019-08-16 12:32:13		EPA200.8	Final	0.1
Aurora Research Institute	190656-049	2.4	C2.4 D=15	Surface Water		2019-07-02	2019-08-06 15:19:00	DICPMS3	Trace Metals, Dissolved	Arsenic		57.2	µg/L	0.2			2019-08-16 12:33:50		EPA200.8	Final	0.2
Aurora Research Institute	190656-049	2.4	C2.4 D=15	Surface Water		2019-07-02	2019-08-06 15:19:00	DICPMS3	Trace Metals, Dissolved	Iron	<	5	ug/L	5			2019-08-16 12:33:50		EPA200.8	Final	5
Aurora Research Institute	190656-049	2.4	C2.4 D=15	Surface Water		2019-07-02	2019-08-06 15:19:00	DICPMS3	Trace Metals, Dissolved	Manganese		14.8	µg/L	0.1			2019-08-16 12:33:50		EPA200.8	Final	0.1
Aurora Research Institute	190656-050	Travel Blank	Travel Blank D=15	Travel Blank		2019-07-02	2019-08-06 15:19:00	DICPMS3	Trace Metals, Dissolved	Arsenic	<	0.2	µg/L	0.2			2019-08-16 10:38:25		EPA200.8	Final	0.2
Aurora Research Institute	190656-050	Travel Blank	Travel Blank D=15	Travel Blank		2019-07-02	2019-08-06 15:19:00	DICPMS3	Trace Metals, Dissolved	Iron	<	5	ug/L	5			2019-08-16 10:38:25		EPA200.8	Final	5
Aurora Research Institute	190656-050	Travel Blank	Travel Blank D=15	Travel Blank		2019-07-02	2019-08-06 15:19:00	DICPMS3	Trace Metals, Dissolved	Manganese	<	0.1	µg/L	0.1			2019-08-16 10:38:25		EPA200.8	Final	0.1
Aurora Research Institute	190656-110	2.1	C2.1 D=15	Pore Water		2019-07-02	2019-08-06 15:19:00	DICPMS3	Trace Metals, Dissolved	Arsenic		86	µg/L	0.2			2019-08-16 16:16:47		EPA200.8	Final	0.2
Aurora Research Institute	190656-110	2.1	C2.1 D=15	Pore Water		2019-07-02	2019-08-06 15:19:00	DICPMS3	Trace Metals, Dissolved	Iron		24	ug/L	5			2019-08-16 16:16:47		EPA200.8	Final	5
Aurora Research Institute	190656-110	2.1	C2.1 D=15	Pore Water		2019-07-02	2019-08-06 15:19:00	DICPMS3	Trace Metals, Dissolved	Manganese		1.1	µg/L	0.1			2019-08-16 16:16:47		EPA200.8	Final	0.1
Aurora Research Institute	190656-111	2.2	C2.2 D=15	Pore Water		2019-07-02	2019-08-06 15:19:00	DICPMS3	Trace Metals, Dissolved	Arsenic		40.6	µg/L	0.2			2019-08-16 16:18:25		EPA200.8	Final	0.2
Aurora Research Institute	190656-111	2.2	C2.2 D=15	Pore Water		2019-07-02	2019-08-06 15:19:00	DICPMS3	Trace Metals, Dissolved	Iron		343	ug/L	5			2019-08-16 16:18:25		EPA200.8	Final	5
Aurora Research Institute	190656-111	2.2	C2.2 D=15	Pore Water		2019-07-02	2019-08-06 15:19:00	DICPMS3	Trace Metals, Dissolved	Manganese		165	µg/L	0.1			2019-08-16 16:18:25		EPA200.8	Final	0.1
Aurora Research Institute	190656-051	2.1	C2.1 D=16	Surface Water		2019-07-03	2019-08-06 15:19:00	DICPMS3	Trace Metals, Dissolved	Arsenic		84.3	µg/L	0.2			2019-08-16 12:35:27		EPA200.8	Final	0.2
Aurora Research Institute	190656-051	2.1	C2.1 D=16	Surface Water		2019-07-03	2019-08-06 15:19:00	DICPMS3	Trace Metals, Dissolved	Iron		25	ug/L	5			2019-08-16 12:35:27		EPA200.8	Final	5
Aurora Research Institute	190656-051	2.1	C2.1 D=16	Surface Water		2019-07-03	2019-08-06 15:19:00	DICPMS3	Trace Metals, Dissolved	Manganese		2.3	µg/L	0.1			2019-08-16 12:35:27		EPA200.8	Final	0.1
Aurora Research Institute	190656-052	2.2	C2.2 D=16	Surface Water		2019-07-03	2019-08-06 15:19:00	DICPMS3	Trace Metals, Dissolved	Arsenic		41.1	µg/L	0.2			2019-08-16 12:37:05		EPA200.8	Final	0.2
Aurora Research Institute	190656-052	2.2	C2.2 D=16	Surface Water		2019-07-03	2019-08-06 15:19:00	DICPMS3	Trace Metals, Dissolved	Iron		19	ug/L	5			2019-08-16 12:37:05		EPA200.8	Final	5
Aurora Research Institute	190656-052	2.2	C2.2 D=16	Surface Water		2019-07-03	2019-08-06 15:19:00	DICPMS3	Trace Metals, Dissolved	Manganese		1.7	µg/L	0.1			2019-08-16 12:37:05		EPA200.8	Final	0.1
Aurora Research Institute	190656-053	2.3	C2.3 D=16	Surface Water		2019-07-03	2019-08-06 15:19:00	DICPMS3	Trace Metals, Dissolved	Arsenic		67.1	µg/L	0.2			2019-08-16 12:38:42		EPA200.8	Final	0.2
Aurora Research Institute	190656-053	2.3	C2.3 D=16	Surface Water		2019-07-03	2019-08-06 15:19:00	DICPMS3	Trace Metals, Dissolved	Iron		5	ug/L	5			2019-08-16 12:38:42		EPA200.8	Final	5
Aurora Research Institute	190656-053	2.3	C2.3 D=16	Surface Water		2019-07-03	2019-08-06 15:19:00	DICPMS3	Trace Metals, Dissolved	Manganese		120	µg/L	0.1			2019-08-16 12:38:42		EPA200.8	Final	0.1
Aurora Research Institute	190656-054	2.4	C2.4 D=16	Surface Water		2019-07-03	2019-08-06 15:19:00	DICPMS3	Trace Metals, Dissolved	Arsenic		56.8	µg/L	0.2			2019-08-16 12:40:19		EPA200.8	Final	0.2
Aurora Research Institute	190656-054	2.4	C2.4 D=16	Surface Water		2019-07-03	2019-08-06 15:19:00	DICPMS3	Trace Metals, Dissolved	Iron	<	5	ug/L	5			2019-08-16 12:40:19		EPA200.8	Final	5
Aurora Research Institute	190656-054	2.4	C2.4 D=16	Surface Water		2019-07-03	2019-08-06 15:19:00	DICPMS3	Trace Metals, Dissolved	Manganese		12.3	µg/L	0.1			2019-08-16 12:40:19		EPA200.8	Final	0.1
Aurora Research Institute	190656-055	2.4	C2.4 Dup D=16	Duplicate		2019-07-03	2019-08-06 15:19:00	DICPMS3	Trace Metals, Dissolved	Arsenic		58.9	µg/L	0.2			2019-08-16 12:41:56		EPA200.8	Final	0.2
Aurora Research Institute	190656-055	2.4	C2.4 Dup D=16	Duplicate		2019-07-03	2019-08-06 15:19:00	DICPMS3	Trace Metals, Dissolved	Iron	<	5	ug/L	5			2019-08-16 12:41:56		EPA200.8	Final	5
Aurora Research Institute	190656-055	2.4	C2.4 Dup D=16	Duplicate		2019-07-03	2019-08-06 15:19:00	DICPMS3	Trace Metals, Dissolved	Manganese		12.7	µg/L	0.1			2019-08-16 12:41:56		EPA200.8	Final	0.1
Aurora Research Institute	190656-056	2.1	C2.1 D=17	Surface Water		2019-07-04	2019-08-06 15:19:00	DICPMS3	Trace Metals, Dissolved	Arsenic		84.8	µg/L	0.2			2019-08-16 12:43:34		EPA200.8	Final	0.2
Aurora Research Institute	190656-056	2.1	C2.1 D=17	Surface Water		2019-07-04	2019-08-06 15:19:00	DICPMS3	Trace Metals, Dissolved	Iron		26	ug/L	5			2019-08-16 12:43:34		EPA200.8	Final	5
Aurora Research Institute	190656-056	2.1	C2.1 D=17	Surface Water		2019-07-04	2019-08-06 15:19:00	DICPMS3	Trace Metals, Dissolved	Manganese		2	µg/L	0.1			2019-08-16 12:43:34		EPA200.8	Final	0.1
Aurora Research Institute	190656-057	2.2	C2.2 D=17	Surface Water		2019-07-04	2019-08-06 15:19:00	DICPMS3	Trace Metals, Dissolved	Arsenic		42.8	µg/L	0.2			2019-08-16 12:45:12		EPA200.8	Final	0.2
Aurora Research Institute	190656-057	2.2	C2.2 D=17	Surface Water		2019-07-04	2019-08-06 15:19:00	DICPMS3	Trace Metals, Dissolved	Iron		17	ug/L	5			2019-08-16 12:45:12		EPA200.8	Final	5
Aurora Research Institute	190656-057	2.2	C2.2 D=17	Surface Water		2019-07-04	2019-08-06 15:19:00	DICPMS3	Trace Metals, Dissolved	Manganese		0.9	µg/L	0.1			2019-08-16 12:45:12		EPA200.8	Final	0.1
Aurora Research Institute	190656-058	2.3	C2.3 D=17	Surface Water		2019-07-04	2019-08-06 15:19:00	DICPMS3	Trace Metals, Dissolved	Arsenic		68.5	µg/L	0.2			2019-08-16 12:46:50		EPA200.8	Final	0.2
Aurora Research Institute	190656-058	2.3	C2.3 D=17	Surface Water		2019-07-04	2019-08-06 15:19:00	DICPMS3	Trace Metals, Dissolved	Iron	<	5	ug/L	5			2019-08-16 12:46:50		EPA200.8	Final	5
Aurora Research Institute	190656-058	2.3	C2.3 D=17	Surface Water		2019-07-04	2019-08-06 15:19:00	DICPMS3	Trace Metals, Dissolved	Manganese		108	µg/L	0.1			2019-08-16 12:46:50		EPA200.8	Final	0.1
Aurora Research Institute	190656-059	2.4	C2.4 D=17	Surface Water		2019-07-04	2019-08-06 15:19:00	DICPMS3	Trace Metals, Dissolved	Arsenic		57.7	µg/L	0.2			2019-08-16 12:48:26		EPA200.8	Final	0.2
Aurora Research Institute	190656-059	2.4	C2.4 D=17	Surface Water		2019-07-04	2019-08-06 15:19:00	DICPMS3	Trace Metals, Dissolved	Iron	<	5	ug/L	5			2019-08-16 12:48:26		EPA200.8	Final	5
Aurora Research Institute	190656-059	2.4	C2.4 D=17	Surface Water		2019-07-04	2019-08-06 15:19:00	DICPMS3	Trace Metals, Dissolved	Manganese		10.8	µg/L	0.1			2019-08-16 12:48:26		EPA200.8	Final	0.1
Aurora Research Institute	190656-060	Field Blank	Field Blank D=17	Field Blank		2019-07-04	2019-08-06 15:19:00	DICPMS3	Trace Metals, Dissolved	Arsenic	<	0.2	µg/L	0.2			2019-08-16 10:40:04		EPA200.8	Final	0.2
Aurora Research Institute	190656-060	Field Blank	Field Blank D=17	Field Blank		2019-07-04	2019-08-06 15:19:00	DICPMS3	Trace Metals, Dissolved	Iron	<	5	ug/L	5			2019-08-16 10:40:04		EPA200.8	Final	5
Aurora Research Institute	190656-060	Field Blank	Field Blank D=17	Field Blank		2019-07-04	2019-08-06 15:19:00	DICPMS3	Trace Metals, Dissolved	Manganese		0.4	µg/L	0.1			2019-08-16 10:40:04		EPA200.8	Final	0.1
Aurora Research Institute	190656-061	2.1	C2.1 D=21	Surface Water		2019-07-08	2019-08-06 15:19:00	DICPMS3	Trace Metals, Dissolved	Arsenic		86.3	µg/L	0.2			2019-08-16 14:28:07		EPA200.8	Final	0.2
Aurora Research Institute	190656-061	2.1	C2.1 D=21	Surface Water		2019-07-08	2019-08-06 15:19:00	DICPMS3	Trace Metals, Dissolved	Iron		31	ug/L	5			2019-08-16 14:28:07		EPA200.8	Final	5
Aurora Research Institute	190656-061	2.1	C2.1 D=21	Surface Water		2019-07-08	2019-08-06 15:19:00	DICPMS3	Trace Metals, Dissolved	Manganese		1.8	µg/L	0.1			2019-08-16 14:28:07		EPA200.8	Final	0.1
Aurora Research Institute	190656-062	2.2	C2.2 D=21	Surface Water		2019-07-08	2019-08-06 15:19:00	DICPMS3	Trace Metals, Dissolved	Arsenic		43.1	µg/L	0.2			2019-08-16 14:29:44		EPA200.8	Final	0.2
Aurora Research Institute	190656-062	2.2	C2.2 D=21	Surface Water		2019-07-08	2019-08-06 15:19:00	DICPMS3	Trace Metals, Dissolved	Iron		15	ug/L	5			2019-08-16 14:29:44		EPA200.8	Final	5
Aurora Research Institute	190656-062	2.2	C2.2 D=21	Surface Water		2019-07-08	2019-08-06 15:19:00	DICPMS3	Trace Metals, Dissolved	Manganese		0.6	µg/L	0.1			2019-08-16 14:29:44		EPA200.8	Final	0.1
Aurora Research Institute	190656-063	2.3	C2.3 D=21	Surface Water		2019-07-08	2019-08-06 15:19:00	DICPMS3	Trace Metals, Dissolved	Arsenic		73.2	µg/L	0.2			2019-08-16 14:31:22		EPA200.8	Final	0.2
Aurora Research Institute	190656-063	2.3	C2.3 D=21	Surface Water		2019-07-08	2019-08-06 15:19:00	DICPMS3	Trace Metals, Dissolved	Iron	<	5	ug/L	5			2019-08-16 14:31:22		EPA200.8	Final	5
Aurora Research Institute	190656-063	2.3	C2.3 D=21	Surface Water		2019-07-08	2019-08-06 15:19:00	DICPMS3	Trace Metals, Dissolved	Manganese		64.4	µg/L	0.1			2019-08-16 14:31:22		EPA200.8	Final	0.1
Aurora Research Institute	190656-064	2.4	C2.4 D=21	Surface Water		2019-07-08	2019-08-06 15:19:00	DICPMS3	Trace Metals, Dissolved	Arsenic		61.2	µg/L	0.2			2019-08-16 14:32:59		EPA200.8	Final	0.2
Aurora Research Institute	190656-064	2.4	C2.4 D=21	Surface Water		2019-07-08	2019-08-06 15:19:00	DICPMS3	Trace Metals, Dissolved	Iron	<	5	ug/L	5			2019-08-16 14:32:59		EPA200.8	Final	5
Aurora Research Institute	190656-064	2.4	C2.4 D=21	Surface Water		2019-07-08	2019-08-06 15:19:00	DICPMS3	Trace Metals, Dissolved	Manganese		5.9	µg/L	0.1			2019-08-16 14:32:59		EPA200.8	Final	0.1
Aurora Research Institute	190656-065	Travel Blank	Travel Blank D=21	Travel Blank		2019-07-08	2019-08-06 15:19:00	DICPMS3	Trace Metals, Dissolved	Arsenic	<	0.2	µg/L	0.2			2019-08-16 14:13:30		EPA200.8	Final	0.2
Aurora Research Institute	190656-065	Travel Blank	Travel Blank D=21	Travel Blank		2019-07-08	2019-08-06 15:19:00	DICPMS3	Trace Metals, Dissolved	Iron	<	5	ug/L	5			2019-08-16 14:13:30		EPA200.8	Final	5
Aurora Research Institute	190656-065	Travel Blank	Travel Blank D=21	Travel Blank		2019-07-08	2019-08-06 15:19:00	DICPMS3	Trace Metals, Dissolved	Manganese	<	0.1	µg/L	0.1			2019-08-16 14:13:30		EPA200.8	Final	0.1
Aurora Research Institute	190656-112	2.1	C2.1 D=22	Pore Water		2019-07-08	2019-08-06 15:19:00	DICPMS3	Trace Metals, Dissolved	Arsenic		102	µg/L	0.2			2019-08-16 16:20:02		EPA200.8	Final	0.2
Aurora Research Institute	190656-112	2.1	C2.1 D=22	Pore Water		2019-07-08	2019-08-06 15:19:00	DICPMS3	Trace Metals, Dissolved	Iron		38	ug/L	5			2019-08-16 16:20:02		EPA200.8	Final	5
Aurora Research Institute	190656-112	2.1	C2.1 D=22	Pore Water		2019-07-08	2019-08-06 15:19:00	DICPMS3	Trace Metals, Dissolved	Manganese		2.2	µg/L	0.1			2019-08-16 16:20:02		EPA200.8	Final	0.1
Aurora Research Institute	190656-113	2.2	C2.2 D=22	Pore Water		2019-07-08	2019-08-06 15:19:00	DICPMS3	Trace Metals, Dissolved	Arsenic		58	µg/L	0.2			2019-08-16 16:21:40		EPA200.8	Final	0.2
Aurora Research Institute	190656-113	2.2	C2.2 D=22	Pore Water		2019-07-08	2019-08-06 15:19:00	DICPMS3	Trace Metals, Dissolved	Iron		419	ug/L	5			2019-08-16 16:21:40		EPA200.8	Final	5
Aurora Research Institute	190656-113	2.2	C2.2 D=22	Pore Water		2019-07-08	2019-08-06 15:19:00	DICPMS3	Trace Metals, Dissolved	Manganese		193	µg/L	0.1			2019-08-16 16:21:40		EPA200.8	Final	0.1
Aurora Research Institute	190656-066	2.1	C2.1 D=22	Surface Water		2019-07-09	2019-08-06 15:19:00	DICPMS3	Trace Metals, Dissolved	Arsenic		101	µg/L	0.2			2019-08-16 14:44:22		EPA200.8	Final	0.2
Aurora Research Institute	190656-066	2.1	C2.1 D=22	Surface Water		2019-07-09	2019-08-06 15:19:00	DICPMS3	Trace Metals, Dissolved	Iron		35	ug/L	5			2019-08-16 14:44:22		EPA200.8	Final	5
Aurora Research Institute	190656-066	2.1	C2.1 D=22	Surface Water		2019-07-09	2019-08-06 15:19:00	DICPMS3	Trace Metals, Dissolved	Manganese		1.6	µg/L	0.1			2019-08-16 14:44:22		EPA200.8	Final	0.1
Aurora Research Institute	190656-067	2.1	C2.1 Dup D=22	Duplicate		2019-07-09	2019-08-06 15:19:00	DICPMS3	Trace Metals, Dissolved	Arsenic		101	µg/L	0.2			2019-08-16 14:45:59		EPA200.8	Final	0.2
Aurora Research Institute	190656-067	2.1	C2.1 Dup D=22	Duplicate		2019-07-09	2019-08-06 15:19:00	DICPMS3	Trace Metals, Dissolved	Iron		33	ug/L	5			2019-08-16 14:45:59		EPA200.8	Final	5
Aurora Research Institute	190656-067	2.1	C2.1 Dup D=22	Duplicate		2019-07-09	2019-08-06 15:19:00	DICPMS3	Trace Metals, Dissolved	Manganese		1.6	µg/L	0.1			2019-08-16 14:45:59		EPA200.8	Final	0.1
Aurora Research Institute	190656-068	2.2	C2.2 D=22	Surface Water		2019-07-09	2019-08-06 15:19:00	DICPMS3	Trace Metals, Dissolved	Arsenic		46.2	µg/L	0.2			2019-08-16 14:47:36		EPA200.8	Final	0.2
Aurora Research Institute	190656-068	2.2	C2.2 D=22	Surface Water		2019-07-09	2019-08-06 15:19:00	DICPMS3	Trace Metals, Dissolved	Iron		15	ug/L	5			2019-08-16 14:47:36		EPA200.8	Final	5
Aurora Research Institute	190656-068	2.2	C2.2 D=22	Surface Water		2019-07-09	2019-08-06 15:19:00	DICPMS3	Trace Metals, Dissolved	Manganese		0.6	µg/L	0.1			2019-08-16 14:47:36		EPA200.8	Final	0.1
Aurora Research Institute	190656-069	2.3	C2.3 D=22	Surface Water		2019-07-09	2019-08-06 15:19:00	DICPMS3	Trace Metals, Dissolved	Arsenic		78.9	µg/L	0.2			2019-08-16 14:49:13		EPA200.8	Final	0.2
Aurora Research Institute	190656-069	2.3	C2.3 D=22	Surface Water		2019-07-09	2019-08-06 15:19:00	DICPMS3	Trace Metals, Dissolved	Iron	<	5	ug/L	5			2019-08-16 14:49:13		EPA200.8	Final	5
Aurora Research Institute	190656-069	2.3	C2.3 D=22	Surface Water		2019-07-09	2019-08-06 15:19:00	DICPMS3	Trace Metals, Dissolved	Manganese		56	µg/L	0.1			2019-08-16 14:49:13		EPA200.8	Final	0.1
Aurora Research Institute	190656-070	2.4	C2.4 D=22	Surface Water		2019-07-09	2019-08-06 15:19:00	DICPMS3	Trace Metals, Dissolved	Arsenic		66.4	µg/L	0.2			2019-08-16 14:50:49		EPA200.8	Final	0.2
Aurora Research Institute	190656-070	2.4	C2.4 D=22	Surface Water		2019-07-09	2019-08-06 15:19:00	DICPMS3	Trace Metals, Dissolved	Iron	<	5	ug/L	5			2019-08-16 14:50:49		EPA200.8	Final	5
Aurora Research Institute	190656-070	2.4	C2.4 D=22	Surface Water		2019-07-09	2019-08-06 15:19:00	DICPMS3	Trace Metals, Dissolved	Manganese		5.3	µg/L	0.1			2019-08-16 14:50:49		EPA200.8	Final	0.1
Aurora Research Institute	190656-071	2.1	C2.1 D=23	Surface Water		2019-07-10	2019-08-06 15:19:00	DICPMS3	Trace Metals, Dissolved	Arsenic		101	µg/L	0.2			2019-08-16 14:52:26		EPA200.8	Final	0.2
Aurora Research Institute	190656-071	2.1	C2.1 D=23	Surface Water		2019-07-10	2019-08-06 15:19:00	DICPMS3	Trace Metals, Dissolved	Iron		43	ug/L	5			2019-08-16 14:52:26		EPA200.8	Final	5
Aurora Research Institute	190656-071	2.1	C2.1 D=23	Surface Water		2019-07-10	2019-08-06 15:19:00	DICPMS3	Trace Metals, Dissolved	Manganese		1.8	µg/L	0.1			2019-08-16 14:52:26		EPA200.8	Final	0.1
Aurora Research Institute	190656-072	2.2	C2.2 D=23	Surface Water		2019-07-10	2019-08-06 15:19:00	DICPMS3	Trace Metals, Dissolved	Arsenic		44.5	µg/L	0.2			2019-08-16 14:54:03		EPA200.8	Final	0.2
Aurora Research Institute	190656-072	2.2	C2.2 D=23	Surface Water		2019-07-10	2019-08-06 15:19:00	DICPMS3	Trace Metals, Dissolved	Iron		15	ug/L	5			2019-08-16 14:54:03		EPA200.8	Final	5
Aurora Research Institute	190656-072	2.2	C2.2 D=23	Surface Water		2019-07-10	2019-08-06 15:19:00	DICPMS3	Trace Metals, Dissolved	Manganese		0.8	µg/L	0.1			2019-08-16 14:54:03		EPA200.8	Final	0.1
Aurora Research Institute	190656-073	2.3	C2.3 D=23	Surface Water		2019-07-10	2019-08-06 15:19:00	DICPMS3	Trace Metals, Dissolved	Arsenic		77.3	µg/L	0.2			2019-08-16 14:55:40		EPA200.8	Final	0.2
Aurora Research Institute	190656-073	2.3	C2.3 D=23	Surface Water		2019-07-10	2019-08-06 15:19:00	DICPMS3	Trace Metals, Dissolved	Iron	<	5	ug/L	5			2019-08-16 14:55:40		EPA200.8	Final	5
Aurora Research Institute	190656-073	2.3	C2.3 D=23	Surface Water		2019-07-10	2019-08-06 15:19:00	DICPMS3	Trace Metals, Dissolved	Manganese		44.8	µg/L	0.1			2019-08-16 14:55:40		EPA200.8	Final	0.1
Aurora Research Institute	190656-074	2.4	C2.4 D=23	Surface Water		2019-07-10	2019-08-06 15:19:00	DICPMS3	Trace Metals, Dissolved	Arsenic		64.6	µg/L	0.2			2019-08-16 14:57:17		EPA200.8	Final	0.2
Aurora Research Institute	190656-074	2.4	C2.4 D=23	Surface Water		2019-07-10	2019-08-06 15:19:00	DICPMS3	Trace Metals, Dissolved	Iron		8	ug/L	5			2019-08-16 14:57:17		EPA200.8	Final	5
Aurora Research Institute	190656-074	2.4	C2.4 D=23	Surface Water		2019-07-10	2019-08-06 15:19:00	DICPMS3	Trace Metals, Dissolved	Manganese		5.1	µg/L	0.1			2019-08-16 14:57:17		EPA200.8	Final	0.1
Aurora Research Institute	190656-075	Field Blank	Field Blank D=23	Field Blank		2019-07-10	2019-08-06 15:19:00	DICPMS3	Trace Metals, Dissolved	Arsenic	<	0.2	µg/L	0.2			2019-08-16 14:15:08		EPA200.8	Final	0.2
Aurora Research Institute	190656-075	Field Blank	Field Blank D=23	Field Blank		2019-07-10	2019-08-06 15:19:00	DICPMS3	Trace Metals, Dissolved	Iron	<	5	ug/L	5			2019-08-16 14:15:08		EPA200.8	Final	5
Aurora Research Institute	190656-075	Field Blank	Field Blank D=23	Field Blank		2019-07-10	2019-08-06 15:19:00	DICPMS3	Trace Metals, Dissolved	Manganese		0.2	µg/L	0.1			2019-08-16 14:15:08		EPA200.8	Final	0.1
Aurora Research Institute	190656-076	2.1	C2.1 D=24	Surface Water		2019-07-11	2019-08-06 15:19:00	DICPMS3	Trace Metals, Dissolved	Arsenic		109	µg/L	0.2			2019-08-16 14:58:54		EPA200.8	Final	0.2
Aurora Research Institute	190656-076	2.1	C2.1 D=24	Surface Water		2019-07-11	2019-08-06 15:19:00	DICPMS3	Trace Metals, Dissolved	Iron		37	ug/L	5			2019-08-16 14:58:54		EPA200.8	Final	5
Aurora Research Institute	190656-076	2.1	C2.1 D=24	Surface Water		2019-07-11	2019-08-06 15:19:00	DICPMS3	Trace Metals, Dissolved	Manganese		2.1	µg/L	0.1			2019-08-16 14:58:54		EPA200.8	Final	0.1
Aurora Research Institute	190656-077	2.2	C2.2 D=24	Surface Water		2019-07-11	2019-08-06 15:19:00	DICPMS3	Trace Metals, Dissolved	Arsenic		45.5	µg/L	0.2			2019-08-16 15:00:31		EPA200.8	Final	0.2
Aurora Research Institute	190656-077	2.2	C2.2 D=24	Surface Water		2019-07-11	2019-08-06 15:19:00	DICPMS3	Trace Metals, Dissolved	Iron		15	ug/L	5			2019-08-16 15:00:31		EPA200.8	Final	5
Aurora Research Institute	190656-077	2.2	C2.2 D=24	Surface Water		2019-07-11	2019-08-06 15:19:00	DICPMS3	Trace Metals, Dissolved	Manganese		0.5	µg/L	0.1			2019-08-16 15:00:31		EPA200.8	Final	0.1
Aurora Research Institute	190656-078	2.3	C2.3 D=24	Surface Water		2019-07-11	2019-08-06 15:19:00	DICPMS3	Trace Metals, Dissolved	Arsenic		79.3	µg/L	0.2			2019-08-16 15:02:09		EPA200.8	Final	0.2
Aurora Research Institute	190656-078	2.3	C2.3 D=24	Surface Water		2019-07-11	2019-08-06 15:19:00	DICPMS3	Trace Metals, Dissolved	Iron		35	ug/L	5			2019-08-16 15:02:09		EPA200.8	Final	5
Aurora Research Institute	190656-078	2.3	C2.3 D=24	Surface Water		2019-07-11	2019-08-06 15:19:00	DICPMS3	Trace Metals, Dissolved	Manganese		37.1	µg/L	0.1			2019-08-16 15:02:09		EPA200.8	Final	0.1
Aurora Research Institute	190656-079	2.4	C2.4 D=24	Surface Water		2019-07-11	2019-08-06 15:19:00	DICPMS3	Trace Metals, Dissolved	Arsenic		66.7	µg/L	0.2			2019-08-16 15:13:32		EPA200.8	Final	0.2
Aurora Research Institute	190656-079	2.4	C2.4 D=24	Surface Water		2019-07-11	2019-08-06 15:19:00	DICPMS3	Trace Metals, Dissolved	Iron	<	5	ug/L	5			2019-08-16 15:13:32		EPA200.8	Final	5
Aurora Research Institute	190656-079	2.4	C2.4 D=24	Surface Water		2019-07-11	2019-08-06 15:19:00	DICPMS3	Trace Metals, Dissolved	Manganese		4.3	µg/L	0.1			2019-08-16 15:13:32		EPA200.8	Final	0.1
Aurora Research Institute	190656-080	Travel Blank	Travel Blank D=24	Travel Blank		2019-07-11	2019-08-06 15:19:00	DICPMS3	Trace Metals, Dissolved	Arsenic	<	0.2	µg/L	0.2			2019-08-16 14:16:45		EPA200.8	Final	0.2
Aurora Research Institute	190656-080	Travel Blank	Travel Blank D=24	Travel Blank		2019-07-11	2019-08-06 15:19:00	DICPMS3	Trace Metals, Dissolved	Iron	<	5	ug/L	5			2019-08-16 14:16:45		EPA200.8	Final	5
Aurora Research Institute	190656-080	Travel Blank	Travel Blank D=24	Travel Blank		2019-07-11	2019-08-06 15:19:00	DICPMS3	Trace Metals, Dissolved	Manganese	<	0.1	µg/L	0.1			2019-08-16 14:16:45		EPA200.8	Final	0.1
Aurora Research Institute	190656-081	2.1	C2.1 D=28	Surface Water		2019-07-15	2019-08-06 15:19:00	DICPMS3	Trace Metals, Dissolved	Arsenic		110	µg/L	0.2			2019-08-16 15:15:09		EPA200.8	Final	0.2
Aurora Research Institute	190656-081	2.1	C2.1 D=28	Surface Water		2019-07-15	2019-08-06 15:19:00	DICPMS3	Trace Metals, Dissolved	Iron		41	ug/L	5			2019-08-16 15:15:09		EPA200.8	Final	5
Aurora Research Institute	190656-081	2.1	C2.1 D=28	Surface Water		2019-07-15	2019-08-06 15:19:00	DICPMS3	Trace Metals, Dissolved	Manganese		1.4	µg/L	0.1			2019-08-16 15:15:09		EPA200.8	Final	0.1
Aurora Research Institute	190656-082	2.2	C2.2 D=28	Surface Water		2019-07-15	2019-08-06 15:19:00	DICPMS3	Trace Metals, Dissolved	Arsenic		47.1	µg/L	0.2			2019-08-16 15:16:45		EPA200.8	Final	0.2
Aurora Research Institute	190656-082	2.2	C2.2 D=28	Surface Water		2019-07-15	2019-08-06 15:19:00	DICPMS3	Trace Metals, Dissolved	Iron		13	ug/L	5			2019-08-16 15:16:45		EPA200.8	Final	5
Aurora Research Institute	190656-082	2.2	C2.2 D=28	Surface Water		2019-07-15	2019-08-06 15:19:00	DICPMS3	Trace Metals, Dissolved	Manganese		0.4	µg/L	0.1			2019-08-16 15:16:45		EPA200.8	Final	0.1
Aurora Research Institute	190656-083	2.2	C2.2 Dup D=28	Duplicate		2019-07-15	2019-08-06 15:19:00	DICPMS3	Trace Metals, Dissolved	Arsenic		49	µg/L	0.2			2019-08-16 15:18:23		EPA200.8	Final	0.2
Aurora Research Institute	190656-083	2.2	C2.2 Dup D=28	Duplicate		2019-07-15	2019-08-06 15:19:00	DICPMS3	Trace Metals, Dissolved	Iron		11	ug/L	5			2019-08-16 15:18:23		EPA200.8	Final	5
Aurora Research Institute	190656-083	2.2	C2.2 Dup D=28	Duplicate		2019-07-15	2019-08-06 15:19:00	DICPMS3	Trace Metals, Dissolved	Manganese		0.2	µg/L	0.1			2019-08-16 15:18:23		EPA200.8	Final	0.1
Aurora Research Institute	190656-084	2.3	C2.3 D=28	Surface Water		2019-07-15	2019-08-06 15:19:00	DICPMS3	Trace Metals, Dissolved	Arsenic		85.6	µg/L	0.2			2019-08-16 15:20:00		EPA200.8	Final	0.2
Aurora Research Institute	190656-084	2.3	C2.3 D=28	Surface Water		2019-07-15	2019-08-06 15:19:00	DICPMS3	Trace Metals, Dissolved	Iron	<	5	ug/L	5			2019-08-16 15:20:00		EPA200.8	Final	5
Aurora Research Institute	190656-084	2.3	C2.3 D=28	Surface Water		2019-07-15	2019-08-06 15:19:00	DICPMS3	Trace Metals, Dissolved	Manganese		13.6	µg/L	0.1			2019-08-16 15:20:00		EPA200.8	Final	0.1
Aurora Research Institute	190656-085	2.4	C2.4 D=28	Surface Water		2019-07-15	2019-08-06 15:19:00	DICPMS3	Trace Metals, Dissolved	Arsenic		70.9	µg/L	0.2			2019-08-16 15:21:36		EPA200.8	Final	0.2
Aurora Research Institute	190656-085	2.4	C2.4 D=28	Surface Water		2019-07-15	2019-08-06 15:19:00	DICPMS3	Trace Metals, Dissolved	Iron		5	ug/L	5			2019-08-16 15:21:36		EPA200.8	Final	5
Aurora Research Institute	190656-085	2.4	C2.4 D=28	Surface Water		2019-07-15	2019-08-06 15:19:00	DICPMS3	Trace Metals, Dissolved	Manganese		2.9	µg/L	0.1			2019-08-16 15:21:36		EPA200.8	Final	0.1
Aurora Research Institute	190656-086	2.1	C2.1 D=29	Surface Water		2019-07-16	2019-08-06 15:19:00	DICPMS3	Trace Metals, Dissolved	Arsenic		112	µg/L	0.2			2019-08-16 15:23:13		EPA200.8	Final	0.2
Aurora Research Institute	190656-086	2.1	C2.1 D=29	Surface Water		2019-07-16	2019-08-06 15:19:00	DICPMS3	Trace Metals, Dissolved	Iron		38	ug/L	5			2019-08-16 15:23:13		EPA200.8	Final	5
Aurora Research Institute	190656-086	2.1	C2.1 D=29	Surface Water		2019-07-16	2019-08-06 15:19:00	DICPMS3	Trace Metals, Dissolved	Manganese		1.1	µg/L	0.1			2019-08-16 15:23:13		EPA200.8	Final	0.1
Aurora Research Institute	190656-087	2.2	C2.2 D=29	Surface Water		2019-07-16	2019-08-06 15:19:00	DICPMS3	Trace Metals, Dissolved	Arsenic		49.8	µg/L	0.2			2019-08-16 15:24:50		EPA200.8	Final	0.2
Aurora Research Institute	190656-087	2.2	C2.2 D=29	Surface Water		2019-07-16	2019-08-06 15:19:00	DICPMS3	Trace Metals, Dissolved	Iron		10	ug/L	5			2019-08-16 15:24:50		EPA200.8	Final	5
Aurora Research Institute	190656-087	2.2	C2.2 D=29	Surface Water		2019-07-16	2019-08-06 15:19:00	DICPMS3	Trace Metals, Dissolved	Manganese		0.2	µg/L	0.1			2019-08-16 15:24:50		EPA200.8	Final	0.1
Aurora Research Institute	190656-088	2.3	C2.3 D=29	Surface Water		2019-07-16	2019-08-06 15:19:00	DICPMS3	Trace Metals, Dissolved	Arsenic		89	µg/L	0.2			2019-08-16 15:26:27		EPA200.8	Final	0.2
Aurora Research Institute	190656-088	2.3	C2.3 D=29	Surface Water		2019-07-16	2019-08-06 15:19:00	DICPMS3	Trace Metals, Dissolved	Iron	<	5	ug/L	5			2019-08-16 15:26:27		EPA200.8	Final	5
Aurora Research Institute	190656-088	2.3	C2.3 D=29	Surface Water		2019-07-16	2019-08-06 15:19:00	DICPMS3	Trace Metals, Dissolved	Manganese		10	µg/L	0.1			2019-08-16 15:26:27		EPA200.8	Final	0.1
Aurora Research Institute	190656-089	2.4	C2.4 D=29	Surface Water		2019-07-16	2019-08-06 15:19:00	DICPMS3	Trace Metals, Dissolved	Arsenic		75.2	µg/L	0.2			2019-08-16 15:28:04		EPA200.8	Final	0.2
Aurora Research Institute	190656-089	2.4	C2.4 D=29	Surface Water		2019-07-16	2019-08-06 15:19:00	DICPMS3	Trace Metals, Dissolved	Iron	<	5	ug/L	5			2019-08-16 15:28:04		EPA200.8	Final	5
Aurora Research Institute	190656-089	2.4	C2.4 D=29	Surface Water		2019-07-16	2019-08-06 15:19:00	DICPMS3	Trace Metals, Dissolved	Manganese		2.2	µg/L	0.1			2019-08-16 15:28:04		EPA200.8	Final	0.1
Aurora Research Institute	190656-090	Field Blank	Field Blank D=29	Field Blank		2019-07-16	2019-08-06 15:19:00	DICPMS3	Trace Metals, Dissolved	Arsenic	<	0.2	µg/L	0.2			2019-08-16 14:18:23		EPA200.8	Final	0.2
Aurora Research Institute	190656-090	Field Blank	Field Blank D=29	Field Blank		2019-07-16	2019-08-06 15:19:00	DICPMS3	Trace Metals, Dissolved	Iron	<	5	ug/L	5			2019-08-16 14:18:23		EPA200.8	Final	5
Aurora Research Institute	190656-090	Field Blank	Field Blank D=29	Field Blank		2019-07-16	2019-08-06 15:19:00	DICPMS3	Trace Metals, Dissolved	Manganese	<	0.1	µg/L	0.1			2019-08-16 14:18:23		EPA200.8	Final	0.1
Aurora Research Institute	190656-114	2.1	C2.1 D=29	Pore Water		2019-07-16	2019-08-06 15:19:00	DICPMS3	Trace Metals, Dissolved	Arsenic		110	µg/L	0.2			2019-08-16 16:23:17		EPA200.8	Final	0.2
Aurora Research Institute	190656-114	2.1	C2.1 D=29	Pore Water		2019-07-16	2019-08-06 15:19:00	DICPMS3	Trace Metals, Dissolved	Iron		65	ug/L	5			2019-08-16 16:23:17		EPA200.8	Final	5
Aurora Research Institute	190656-114	2.1	C2.1 D=29	Pore Water		2019-07-16	2019-08-06 15:19:00	DICPMS3	Trace Metals, Dissolved	Manganese		23.3	µg/L	0.1			2019-08-16 16:23:17		EPA200.8	Final	0.1
Aurora Research Institute	190656-115	2.2	C2.2 D=29	Pore Water		2019-07-16	2019-08-06 15:19:00	DICPMS3	Trace Metals, Dissolved	Arsenic		48.5	µg/L	0.2			2019-08-16 16:26:31		EPA200.8	Final	0.2
Aurora Research Institute	190656-115	2.2	C2.2 D=29	Pore Water		2019-07-16	2019-08-06 15:19:00	DICPMS3	Trace Metals, Dissolved	Iron		944	ug/L	5			2019-08-16 16:26:31		EPA200.8	Final	5
Aurora Research Institute	190656-115	2.2	C2.2 D=29	Pore Water		2019-07-16	2019-08-06 15:19:00	DICPMS3	Trace Metals, Dissolved	Manganese		364	µg/L	0.1			2019-08-16 16:26:31		EPA200.8	Final	0.1
Aurora Research Institute	190656-095	Travel Blank	Travel Blank D=30	Travel Blank		2019-07-17	2019-08-06 15:19:00	DICPMS3	Trace Metals, Dissolved	Arsenic	<	0.2	µg/L	0.2			2019-08-16 14:20:01		EPA200.8	Final	0.2
Aurora Research Institute	190656-095	Travel Blank	Travel Blank D=30	Travel Blank		2019-07-17	2019-08-06 15:19:00	DICPMS3	Trace Metals, Dissolved	Iron	<	5	ug/L	5			2019-08-16 14:20:01		EPA200.8	Final	5
Aurora Research Institute	190656-095	Travel Blank	Travel Blank D=30	Travel Blank		2019-07-17	2019-08-06 15:19:00	DICPMS3	Trace Metals, Dissolved	Manganese	<	0.1	µg/L	0.1			2019-08-16 14:20:01		EPA200.8	Final	0.1
Aurora Research Institute	190656-098	2.3	C2.3 D=31	Surface Water		2019-07-18	2019-08-06 15:19:00	DICPMS3	Trace Metals, Dissolved	Arsenic		86.8	µg/L	0.2			2019-08-16 15:49:12		EPA200.8	Final	0.2
Aurora Research Institute	190656-098	2.3	C2.3 D=31	Surface Water		2019-07-18	2019-08-06 15:19:00	DICPMS3	Trace Metals, Dissolved	Iron	<	5	ug/L	5			2019-08-16 15:49:12		EPA200.8	Final	5
Aurora Research Institute	190656-098	2.3	C2.3 D=31	Surface Water		2019-07-18	2019-08-06 15:19:00	DICPMS3	Trace Metals, Dissolved	Manganese		6.3	µg/L	0.1			2019-08-16 15:49:12		EPA200.8	Final	0.1
Aurora Research Institute	190656-099	2.3	C2.3 Dup D=31	Duplicate		2019-07-18	2019-08-06 15:19:00	DICPMS3	Trace Metals, Dissolved	Arsenic		89.1	µg/L	0.2			2019-08-16 15:50:48		EPA200.8	Final	0.2
Aurora Research Institute	190656-099	2.3	C2.3 Dup D=31	Duplicate		2019-07-18	2019-08-06 15:19:00	DICPMS3	Trace Metals, Dissolved	Iron	<	5	ug/L	5			2019-08-16 15:50:48		EPA200.8	Final	5
Aurora Research Institute	190656-099	2.3	C2.3 Dup D=31	Duplicate		2019-07-18	2019-08-06 15:19:00	DICPMS3	Trace Metals, Dissolved	Manganese		6.4	µg/L	0.1			2019-08-16 15:50:48		EPA200.8	Final	0.1
Aurora Research Institute	190656-105	Field Blank	Field Blank D=35	Field Blank		2019-07-22	2019-08-06 15:19:00	DICPMS3	Trace Metals, Dissolved	Arsenic	<	0.2	µg/L	0.2			2019-08-16 14:21:39		EPA200.8	Final	0.2
Aurora Research Institute	190656-105	Field Blank	Field Blank D=35	Field Blank		2019-07-22	2019-08-06 15:19:00	DICPMS3	Trace Metals, Dissolved	Iron	<	5	ug/L	5			2019-08-16 14:21:39		EPA200.8	Final	5
Aurora Research Institute	190656-105	Field Blank	Field Blank D=35	Field Blank		2019-07-22	2019-08-06 15:19:00	DICPMS3	Trace Metals, Dissolved	Manganese		0.2	µg/L	0.1			2019-08-16 14:21:39		EPA200.8	Final	0.1
Aurora Research Institute	190656-010	Travel Blank	Travel Blank D=36	Travel Blank		2019-07-23	2019-08-06 15:19:00	DICPMS3	Trace Metals, Dissolved	Arsenic	<	0.2	µg/L	0.2			2019-08-16 10:28:38		EPA200.8	Final	0.2
Aurora Research Institute	190656-010	Travel Blank	Travel Blank D=36	Travel Blank		2019-07-23	2019-08-06 15:19:00	DICPMS3	Trace Metals, Dissolved	Iron	<	5	ug/L	5			2019-08-16 10:28:38		EPA200.8	Final	5
Aurora Research Institute	190656-010	Travel Blank	Travel Blank D=36	Travel Blank		2019-07-23	2019-08-06 15:19:00	DICPMS3	Trace Metals, Dissolved	Manganese	<	0.1	µg/L	0.1			2019-08-16 10:28:38		EPA200.8	Final	0.1

## Sheet: Surface Water_Metal(loid)s_QAQC
Core	Date	Sample ID	Sample Day	Flagged	[As] ug/L	Flagged	[Fe] ug/L	Flagged	[Mn] ug/L
Core 2.1	2019-06-17	C2.1 D=0	0		58		33		3.2
Core 2.1	2019-06-17	C2.1 Dup D=0	0		57.5		35		3.2
AVG					57.75		34		3.2
RSD					0.612214		4.15945		0
Core 2.2	2019-06-21	C2.2 D=4	1		35.2		28		3.5
Core 2.2	2019-06-21	C2.2 Dup D=4	1		34.9		28		3.5
AVG					35.05		28		3.5
RSD					0.605227		0		0
Core 2.3	2019-06-26	C2.3 D=9	9		58.3		7		195
Core 2.3	2019-06-26	C2.3 Dup D=9	9		59.9	<	5		203
AVG					59.1		6		199
RSD					1.91433		23.5702		2.84264
Core 2.4	2019-07-03	C2.4 D=16	16		56.8	<	5		12.3
Core 2.4	2019-07-03	C2.4 Dup D=16	16		58.9	<	5		12.7
AVG					57.85	<	5		12.5
RDS					2.56685		0		2.26274
Core 2.1	2019-07-09	C2.1 D=22	22		101		35		1.6
Core 2.1	2019-07-09	C2.1 Dup D=22	22		101		33		1.6
AVG					101		34		1.6
RSD					0		4.15945		0
Core 2.2	2019-07-15	C2.2 D=28	28		47.1		13		0.4
Core 2.2	2019-07-15	C2.2 Dup D=28	28		49		11		0.2
AVG					48.05		12		0.3
RSD					2.79605		11.7851		47.1405
Core 2.3	2019-07-18	C2.3 D=31	31		86.8		5		6.3
Core 2.3	2019-07-18	C2.3 Dup D=31	31		89.1	<	5		6.4
AVG					87.95	<	5		6.35
RSD					1.84917		0		1.11355
	2019-06-18	Field Blank	1	<	0.2	<	5		0.2
	2019-06-19	Field Blank	2	<	0.2	<	5	<	0.1
	2019-06-24	Field Blank	7	<	0.2	<	5		0.3
	2019-06-28	Field Blank	11	<	0.2	<	5		0.2
	2019-07-04	Field Blank	17	<	0.2	<	5		0.4
	2019-07-10	Field Blank	23	<	0.2	<	5		0.2
	2019-07-16	Field Blank	29	<	0.2	<	5	<	0.1
	2019-07-22	Field Blank	35	<	0.2	<	5		0.2
	2019-06-25	Travel Blank	8	<	0.2	<	5	<	0.1
	2019-07-02	Travel Blank	15	<	0.2	<	5	<	0.1
	2019-07-08	Travel Blank	21	<	0.2	<	5	<	0.1
	2019-07-11	Travel Blank	24	<	0.2	<	5	<	0.1
	2019-07-17	Travel Blank	30	<	0.2	<	5	<	0.1
	2019-07-23	Travel Blank	36	<	0.2	<	5	<	0.1

## Sheet: Surface Water_Sulfate
	SUMMARY DATA:
	SO4 concentration in ppm
	Highlighted with red are
	values below LOD (or 5X) ppm:	0.0715
		SO4
	Calibration Stds	ppm
	0	0.00191396
	0.078	0.0781022
	0.156	0.154661
	0.3125	0.309855
	0.625	0.62732
	1.25	1.24965
	2.5	2.47583
	5	4.94116
	10	10.0278
	0.05ppm	0.058943
	0.05ppm	0.0566978
	0.05ppm	0.0569785
	0.05ppm	0.0527665
	0.05ppm	0.0533283
	0.05ppm	0.0545921
	AVERAGE:	0.055551
	STDEV:	0.00238629
	LOD for 1X (ppm)	0.00715887
	LOD for 5X (ppm)	0.0715887
Lake	Sample
Lower Martin	C2.1; D=0	3.58889
Lower Martin	C2.1 Dup; D=0	3.59905
Lower Martin	C2.1; D=7	4.25011
Lower Martin	C2.1; D=15	5.08645
Lower Martin	C2.1; D=22	6.03406
Lower Martin	C2.1; D=29	4.94329
Lower Martin	C2.2; D=0	3.238
Lower Martin	C2.2; D=7	3.50611
Lower Martin	C2.2; D=15	3.40301
Lower Martin	C2.2; D=22	4.18253
Lower Martin	C2.2 Dup; D=22	4.17287
Lower Martin	C2.2; D=29	4.66846
Yellowknife Bay	C2.3; D=0	18.3399
Yellowknife Bay	C2.3; D=7	34.2537
Yellowknife Bay	C2.3; D=15	50.9106
Yellowknife Bay	C2.3; D=22	67.6779
Yellowknife Bay	C2.3; D=29	84.677
Yellowknife Bay	C2.4; D=0	17.006
Yellowknife Bay	C2.4; D=7	29.9628
Yellowknife Bay	C2.4; D=15	43.7886
Yellowknife Bay	C2.4; D=22	57.3011
Yellowknife Bay	C2.4; D=29	72.313
	C2.4; D=36	81.9411
	C2.4 Dup; D=36	83.2643
	Field Blank; D=29	0.0411558
	Field Blank; D=7	0.0730464
	Travel Blank; D=15	0.0196774

## Sheet: Surface Water_DN DOC
Attention: John Chételat							Core 2.1 - Lower Martin Lake					Blank-corrected values
Project #: YELLOWKNIFE - BATCH 1							Date	Experiment Day	Core ID	Nitrogen Soluble (mg/L)	Carbon Dissolved Organic (mg/L)	Nitrogen Soluble (mg/L)	Carbon Dissolved Organic (mg/L)
Location: Lab Incubation							2019-06-17	0	C2.1; D=0	2.8	14.7	2.35	12.8
Analysis of Water							2019-06-24	7	C2.1; D=7	3.7	16.8	3.25	14.9
Analytes:			Nitrogen - Soluble	Carbon - Dissolved Organic			2019-07-02	15	C2.1; D=15	5	17.9	4.55	16
Units:			mg/L	mg/L			2019-07-09	22	C2.1; D=22	< 0.2	< 0.5
RL:			0.2	0.5			2019-07-16	29	C2.1; D=29	6.6	16.9	6.15	15
RPC Sample ID	Client Sample ID	Date Sampled
323301-01	Field Blank; D=7	2019-06-24	0.3	2.3			Core 2.2 - Lower Martin Lake
323301-02	C2.1; D=15	2019-07-02	5	17.9			Date	Experiment Day	Core ID	Nitrogen Soluble (mg/L)	Carbon Dissolved Organic (mg/L)
323301-03	C2.2; D=15	2019-07-02	3.6	17.4			2019-06-17	0	C2.2; D=0	3.3	16.9	2.85	15
323301-04	C2.3; D=15	2019-07-02	0.6	8.3			2019-06-24	7	C2.2; D=7	2.5	15.1	2.05	13.2
323301-05	C2.4; D=15	2019-07-02	0.6	8.9			2019-07-02	15	C2.2; D=15	3.6	17.4	3.15	15.5
323301-06	Travel Blank; D=15	2019-07-02	< 0.2	0.6			2019-07-09	22	C2.2; D=22	4.4	17	3.95	15.1
323301-07	C2.1; D=22	2019-07-09	< 0.2	< 0.5			2019-07-16	29	C2.2; D=29	4.2	16	3.75	14.1
323301-08	C2.2; D=22	2019-07-09	4.4	17
323301-09	C2.2 Dup; D=22	2019-07-09	3.4	15.9			Core 2.3 - Yellowknife Bay
323301-10	C2.3; D=22	2019-07-09	0.9	8.6			Date	Experiment Day	Core ID	Nitrogen Soluble (mg/L)	Carbon Dissolved Organic (mg/L)
323301-11	C2.1; D=0	2019-06-17	2.8	14.7			2019-06-17	0	C2.3; D=0	0.8	5.7	0.35	3.8
323301-12	C2.1 Dup; D=0	2019-06-17	3.2	17			2019-06-24	7	C2.3; D=7	0.3	6	< 0.2	4.1
323301-13	C2.2; D=0	2019-06-17	3.3	16.9			2019-07-02	15	C2.3; D=15	0.6	8.3	0.15	6.4
323301-14	C2.3; D=0	2019-06-17	0.8	5.7			2019-07-09	22	C2.3; D=22	0.9	8.6	0.45	6.7
323301-15	C2.4; D=0	2019-06-17	1.2	7.2			2019-07-16	29	C2.3; D=29	0.7	7.4	0.25	5.5
323301-16	Travel Blank; D=0	2019-06-17	< 0.2	< 0.5
323301-17	C2.1; D=7	2019-06-24	3.7	16.8			Core 2.4 - Yellowknife Bay
323301-18	C2.2; D=7	2019-06-24	2.5	15.1			Date		Core ID	Nitrogen Soluble (mg/L)	Carbon Dissolved Organic (mg/L)
323301-19	C2.3; D=7	2019-06-24	0.3	6			2019-06-17	0	C2.4; D=0	1.2	7.2	0.75	5.3
323301-20	C2.4; D=7	2019-06-24	1.4	7.8			2019-06-24	7	C2.4; D=7	1.4	7.8	0.95	5.9
323301-21	C2.4; D=22	2019-07-09	1.8	12.4			2019-07-02	15	C2.4; D=15	0.6	8.9	0.15	7
323301-22	C2.1; D=29	2019-07-16	6.6	16.9			2019-07-09	22	C2.4; D=22	1.8	12.4	1.35	10.5
323301-23	C2.2; D=29	2019-07-16	4.2	16			2019-07-16	29	C2.4; D=29	0.6	11.7	0.15	9.8
323301-24	C2.3; D=29	2019-07-16	0.7	7.4
323301-25	C2.4; D=29	2019-07-16	0.6	11.7
323301-26	Field Blank; D=29	2019-07-16	0.6	1.5			Field and Travel Blanks
323301-30	C2.3 Dup; D=36	2019-07-23	0.4	7.6			Date	Experiment Day	Core ID	Nitrogen Soluble (mg/L)	Carbon Dissolved Organic (mg/L)
323301-31	C2.4; D=36	2019-07-23	0.6	9.3			2019-06-17	0	Travel Blank; D=0	< 0.2	< 0.5
							2019-06-24	7	Field Blank; D=7	0.3	2.3
This report relates only to the sample(s) and information provided to the laboratory.							2019-07-02	15	Travel Blank; D=15	< 0.2	0.6
RL = Reporting Limit							2019-07-16	29	Field Blank; D=29	0.6	1.5
									Average Field Blank	0.45	1.9
							Duplicates
							2019-06-17	0	C2.1; D=0	2.8	14.7
								0	C2.1 Dup; D=0	3.2	17
									RSD	9.42809	10.2609
							2019-07-09	22	C2.2; D=22	4.4	17
								22	C2.2 Dup; D=22	3.4	15.9
										18.1309	4.72837
							2019-07-23	36	C2.3; D=36	0.4	8.4
								36	C2.3 Dup; D=36	0.4	7.6
										0	7.07107
									Mean RSD	9.18634	7.35343

## Sheet: Incubation Fluxes by Treatment
Surface Water
Lake	Core	Date	Sample ID	Sample Day	Treatment	Water Vol. (L)	[As] ug/L	Mass As (ug)	Flux As (ug/m^2/day)	Flagged	[Fe] ug/L	Mass Fe (ug)	Flux Fe (ug/m^2/day)	[Mn] ug/L	Mass Mn (ug)	Flux Mn (ug/m^2/day)		pH	Mean Temp, Day (°C)	ORP (mV)
Lower Martin	2.1	2019-06-17	C2.1 D=0	0	1	1.42316	58	82.5433			33	46.9643		3.2	4.55411			7.64679	8.20357	131.638
Lower Martin	2.1	2019-06-18	C2.1 D=1	1	1	1.38616	56.4	78.1794			31	42.971		2.4	3.32678			7.65812	6.75417	118.609
Lower Martin	2.1	2019-06-19	C2.1 D=2	2	1	1.38116	62.5	86.3225			31	42.816		2.4	3.31478			7.63125	6.72708	104.796
Lower Martin	2.1	2019-06-21	C2.1 D=4	4	1	1.37616	65.7	90.4137			36	49.5418		1.7	2.33947			7.66146	6.73958	104.439
Lower Martin	2.1	2019-06-24	C2.1 D=7	7	1	1.37116	66.7	91.4564	219.156		26	35.6502	-278.193	1.1	1.50828	-74.8915		7.61333	6.1	98.2587
Lower Martin	2.1	2019-06-25	C2.1 D=8	8	2	1.35116	72.4	97.824			31	41.886		2	2.70232			7.60958	11.6896	107.235
Lower Martin	2.1	2019-06-26	C2.1 D=9	9	2	1.34616	74.4	100.154			29	39.0386		1.4	1.88462			7.62771	11.6917	125.401
Lower Martin	2.1	2019-06-28	C2.1 D=11	11	2	1.34116	77.9	104.476			27	36.2113		0.9	1.20704			7.64542	11.6979	191.186
Lower Martin	2.1	2019-07-02	C2.1 D=15	15	2	1.33616	85	113.574	387.254		22	29.3955	-307.117	0.8	1.06893	-40.1621		7.62771	11.1	258.854
Lower Martin	2.1	2019-07-03	C2.1 D=16	16	3	1.31616	84.3	110.952			25	32.904		2.3	3.02717			7.59542	16.375	272.252
Lower Martin	2.1	2019-07-04	C2.1 D=17	17	3	1.31116	84.8	111.186			26	34.0902		2	2.62232			7.59479	16.3646	299.126
Lower Martin	2.1	2019-07-08	C2.1 D=21	21	3	1.30616	86.3	112.722	60.906		31	40.491	261.169	1.8	2.35109	-23.273		7.57417	15.7	374.978
Lower Martin	2.1	2019-07-09	C2.1 D=22	22	4	1.30116	101	131.417			35	45.5406		1.6	2.08186			7.52167	21.4708	389.167
Lower Martin	2.1	2019-07-10	C2.1 D=23	23	4	1.28116	101	129.397			43	55.0899		1.8	2.30609			7.48917	21.4667	400.005
Lower Martin	2.1	2019-07-11	C2.1 D=24	24	4	1.27616	109	139.101			37	47.2179		2.1	2.67994			7.47563	21.4271	409.732
Lower Martin	2.1	2019-07-15	C2.1 D=28	28	4	1.27116	110	139.828			41	52.1176		1.4	1.77962			7.52521	21.4875	417.314
Lower Martin	2.1	2019-07-16	C2.1 D=29	29	4	1.26616	112	141.81	255.539		38	48.1141	63.2771	1.1	1.39278	-16.9432		7.46688	21.5255	425.597
Lower Martin	2.2	2019-06-17	C2.2 D=0	0	1	1.44494	34.2	49.4169			36	52.0178		4.1	5.92425			7.64679	8.075	169.465
Lower Martin	2.2	2019-06-18	C2.2 D=1	1	1	1.42494	33.9	48.3055			36	51.2978		3.2	4.55981			7.72458	6.65833	115.918
Lower Martin	2.2	2019-06-19	C2.2 D=2	2	1	1.41994	34.8	49.4139			32	45.4381		3.3	4.6858			7.70021	6.60208	111.619
Lower Martin	2.2	2019-06-21	C2.2 D=4	4	1	1.41494	35.2	49.8059			28	39.6183		3.5	4.95229			7.43375	6.57917	109.416
Lower Martin	2.2	2019-06-24	C2.2 D=7	7	1	1.40494	36.7	51.5613	52.7256		18	25.2889	-657.215	0.2	0.280988	-138.757		7.48375	6	135.272
Lower Martin	2.2	2019-06-25	C2.2 D=8	8	2	1.38494	36.4	50.4118			17	23.544		0.8	1.10795			7.41521	11.5375	156.075
Lower Martin	2.2	2019-06-26	C2.2 D=9	9	2	1.37994	37.5	51.7477			16	22.079		0.5	0.68997			7.48104	11.5417	184.834
Lower Martin	2.2	2019-06-28	C2.2 D=11	11	2	1.37494	38	52.2477			15	20.6241		0.5	0.68747			7.51292	11.5125	199.651
Lower Martin	2.2	2019-07-02	C2.2 D=15	15	2	1.36994	41.8	57.2635	168.47		13	17.8092	-141.007	0.5	0.68497	-10.4003		7.43354	11	184.327
Lower Martin	2.2	2019-07-03	C2.2 D=16	16	3	1.34994	41.1	55.4825			19	25.6489		1.7	2.2949			7.39104	15.6833	183.907
Lower Martin	2.2	2019-07-04	C2.2 D=17	17	3	1.34494	42.8	57.5634			17	22.864		0.9	1.21045			7.35563	15.7812	186.57
Lower Martin	2.2	2019-07-08	C2.2 D=21	21	3	1.33994	43.1	57.7514	78.1026		15	20.0991	-191.042	0.6	0.803964	-51.323		7.29396	15.7	227.169
Lower Martin	2.2	2019-07-09	C2.2 D=22	22	4	1.33494	46.2	61.6742			15	20.0241		0.6	0.800964			7.28917	21.3562	266.454
Lower Martin	2.2	2019-07-10	C2.2 D=23	23	4	1.29794	44.5	57.7583			15	19.4691		0.8	1.03835			7.28687	21.3729	285.687
Lower Martin	2.2	2019-07-11	C2.2 D=24	24	4	1.29294	45.5	58.8288			15	19.3941		0.5	0.64647			7.35979	21.3417	301.089
Lower Martin	2.2	2019-07-15	C2.2 D=28	28	4	1.28794	47.1	60.662			13	16.7432		0.4	0.515176			7.43812	21.3979	307.321
Lower Martin	2.2	2019-07-16	C2.2 D=29	29	4	1.27794	49.8	63.6414	48.3694		10	12.7794	-178.134	0.2	0.255588	-13.4098		7.335	21.1812	309.723
Yellowknife Bay	2.3	2019-06-17	C2.3 D=0	0	1	1.30698	23.5	30.714		<	5	6.5349		168	219.573			7.09607	8.35714	289.881
Yellowknife Bay	2.3	2019-06-18	C2.3 D=1	1	1	1.28998	25.9	33.4105		<	5	6.4499		186	239.936			7.21667	6.675	201.838
Yellowknife Bay	2.3	2019-06-19	C2.3 D=2	2	1	1.28498	33.2	42.6613		<	5	6.4249		196	251.856			7.21625	6.61042	184.244
Yellowknife Bay	2.3	2019-06-21	C2.3 D=4	4	1	1.27998	44.2	56.5751		<	5	6.3999		204	261.116			7.27042	6.72708	174.64
Yellowknife Bay	2.3	2019-06-24	C2.3 D=7	7	1	1.27498	54.6	69.6139	956.476	<	5	6.3749	-3.9341	212	270.296	1247.19		7.25833	6.3	176.104
Yellowknife Bay	2.3	2019-06-25	C2.3 D=8	8	2	1.25798	55.8	70.1953		<	5	6.2899		199	250.338			7.27813	11.5938	176.173
Yellowknife Bay	2.3	2019-06-26	C2.3 D=9	9	2	1.25298	58.3	73.0487			7	8.77086		195	244.331			7.29	11.6187	176.675
Yellowknife Bay	2.3	2019-06-28	C2.3 D=11	11	2	1.24298	61.5	76.4433		<	5	6.2149		175	217.522			7.31896	11.6229	181.34
Yellowknife Bay	2.3	2019-07-02	C2.3 D=15	15	2	1.23798	68.7	85.0492	365.231	<	5	6.1899	-2.45881	139	172.079	-1924.24		7.34417	11.2	186.786
Yellowknife Bay	2.3	2019-07-03	C2.3 D=16	16	3	1.22098	67.1	81.9278			5	6.1049		120	146.518			7.34375	16.2604	179.734
Yellowknife Bay	2.3	2019-07-04	C2.3 D=17	17	3	1.21598	68.5	83.2946		<	5	6.0799		108	131.326			7.33583	16.2604	179.032
Yellowknife Bay	2.3	2019-07-08	C2.3 D=21	21	3	1.21098	73.2	88.6437	231.187	<	5	6.0549	-1.72117	64.4	77.9871	-2359.05		7.38375	15.9	174.694
Yellowknife Bay	2.3	2019-07-09	C2.3 D=22	22	4	1.20598	78.9	95.1518		<	5	6.0299		56	67.5349			7.3875	21.2625	175.282
Yellowknife Bay	2.3	2019-07-10	C2.3 D=23	23	4	1.18898	77.3	91.9082		<	5	5.9449		44.8	53.2663			7.39417	21.2542	176.584
Yellowknife Bay	2.3	2019-07-11	C2.3 D=24	24	4	1.18398	79.3	93.8896			35	41.4393		37.1	43.9257			7.39417	21.2646	180.459
Yellowknife Bay	2.3	2019-07-15	C2.3 D=28	28	4	1.17898	85.6	100.921		<	5	5.8949		13.6	16.0341			7.46333	21.2896	182.764
Yellowknife Bay	2.3	2019-07-16	C2.3 D=29	29	4	1.17398	89	104.484	229.466	<	5	5.8699	-3.9341	10	11.7398	-1371.9		7.40875	21.3083	186.016
Yellowknife Bay	2.4	2019-06-17	C2.4 D=0	0	1	1.30698	22.6	29.5377		<	5	6.5349		48.6	63.5192			7.09607	8.175	228.028
Yellowknife Bay	2.4	2019-06-18	C2.4 D=1	1	1	1.28998	23.1	29.7985		<	5	6.4499		46.3	59.7261			7.27354	6.63333	174.103
Yellowknife Bay	2.4	2019-06-19	C2.4 D=2	2	1	1.28498	28.7	36.8789		<	5	6.4249		46.5	59.7516			7.31771	6.63333	171.753
Yellowknife Bay	2.4	2019-06-21	C2.4 D=4	4	1	1.27998	37.1	47.4873		<	5	6.3999		42.9	54.9111			7.35313	6.675	170.596
Yellowknife Bay	2.4	2019-06-24	C2.4 D=7	7	1	1.27498	45.4	57.8841	696.984	<	5	6.3749	-3.9341	35.9	45.7718	-436.377		7.28813	6.2	172.636
Yellowknife Bay	2.4	2019-06-25	C2.4 D=8	8	2	1.25798	46.9	58.9993		<	5	6.2899		31.5	39.6264			7.24292	11.5854	177.944
Yellowknife Bay	2.4	2019-06-26	C2.4 D=9	9	2	1.25298	48.6	60.8948		<	5	6.2649		28.8	36.0858			7.29375	11.575	174.979
Yellowknife Bay	2.4	2019-06-28	C2.4 D=11	11	2	1.24298	51.1	63.5163		<	5	6.2149		23.1	28.7128			7.29937	11.6042	174.637
Yellowknife Bay	2.4	2019-07-02	C2.4 D=15	15	2	1.23798	57.2	70.8125	290.465	<	5	6.1899	-2.45881	14.8	18.3221	-523.832		7.26833	11.1	177.094
Yellowknife Bay	2.4	2019-07-03	C2.4 D=16	16	3	1.22098	56.8	69.3517		<	5	6.1049		12.3	15.0181			7.22063	16.2354	181.707
Yellowknife Bay	2.4	2019-07-04	C2.4 D=17	17	3	1.21598	57.7	70.162		<	5	6.0799		10.8	13.1326			7.22667	16.2458	181.267
Yellowknife Bay	2.4	2019-07-08	C2.4 D=21	21	3	1.21098	61.2	74.112	163.866	<	5	6.0549	-1.72117	5.9	7.14478	-271.025		7.29333	15.8	180.346
Yellowknife Bay	2.4	2019-07-09	C2.4 D=22	22	4	1.20598	66.4	80.0771		<	5	6.0299		5.3	6.39169			7.33396	21.2958	177.437
Yellowknife Bay	2.4	2019-07-10	C2.4 D=23	23	4	1.18898	64.6	76.8081			8	9.51184		5.1	6.0638			7.32083	21.2771	177.475
Yellowknife Bay	2.4	2019-07-11	C2.4 D=24	24	4	1.18398	66.7	78.9715		<	5	5.9199		4.3	5.09111			7.32521	21.2708	176.401
Yellowknife Bay	2.4	2019-07-15	C2.4 D=28	28	4	1.17898	70.9	83.5897			5	5.8949		2.9	3.41904			7.38125	21.2854	177.118
Yellowknife Bay	2.4	2019-07-16	C2.4 D=29	29	4	1.17398	75.2	88.2833	201.776	<	5	5.8699	-3.9341	2.2	2.58276	-93.6547		7.34167	21.3063	179.851

## Sheet: Porewater
Porewater (1 cm below sediment-water interface)
Lake	Core	Date	Sample ID	Sample Day	[As] ug/L	[Fe] ug/L	[Mn] ug/L		Core 1	[As] ug/L	[Fe] ug/L	[Mn] ug/L
Lower Martin	2.1	2019-06-17	C2.1 D=0	0	124	78	45.4		Average	104.6	45.6	15.2
Lower Martin	2.1	2019-06-24	C2.1 D=7	7	101	23	4		SD	13.8852	24.8052	19.1762
Lower Martin	2.1	2019-07-02	C2.1 D=15	15	86	24	1.1
Lower Martin	2.1	2019-07-08	C2.1 D=22	22	102	38	2.2
Lower Martin	2.1	2019-07-16	C2.1 D=29	29	110	65	23.3
Lower Martin	2.2	2019-06-17	C2.2 D=0	0	42.5	463	231		Core 2	[As] ug/L	[Fe] ug/L	[Mn] ug/L
Lower Martin	2.2	2019-06-24	C2.2 D=7	7	32.3	396	177		Average	44.38	513	226
Lower Martin	2.2	2019-07-02	C2.2 D=15	15	40.6	343	165		SD	9.56854	244.789	81.0555
Lower Martin	2.2	2019-07-08	C2.2 D=22	22	58	419	193
Lower Martin	2.2	2019-07-16	C2.2 D=29	29	48.5	944	364

## Sheet: Sediment
Bureau Veritas Commodities Canada Ltd.					Final Report	1
Client:	Environment and Climate Change Canada
File Created:	2019-12-22
Job Number:	VAN19003778
Number of Samples:	91
Project:	Yellowknife Bay
Shipment ID:
P.O. Number:
Received:	2019-12-10
	Method	AQ250	AQ250	AQ250	AQ250	AQ250	AQ250	AQ250	AQ250	AQ250	AQ250	AQ250	AQ250	AQ250	AQ250	AQ250	AQ250	AQ250	AQ250	AQ250	AQ250	AQ250	AQ250	AQ250	AQ250	AQ250	AQ250	AQ250	AQ250	AQ250	AQ250	AQ250	AQ250	AQ250	AQ250	AQ250	AQ250	AQ250
	Analyte	Mo	Cu	Pb	Zn	Ag	Ni	Co	Mn	Fe	As	U	Au	Th	Sr	Cd	Sb	Bi	V	Ca	P	La	Cr	Mg	Ba	Ti	B	Al	Na	K	W	Sc	Tl	S	Hg	Se	Te	Ga
	Unit	PPM	PPM	PPM	PPM	PPB	PPM	PPM	PPM	%	PPM	PPM	PPB	PPM	PPM	PPM	PPM	PPM	PPM	%	%	PPM	PPM	%	PPM	%	PPM	%	%	%	PPM	PPM	PPM	%	PPB	PPM	PPM	PPM
	MDL	0.01	0.01	0.01	0.1	2	0.1	0.1	1	0.01	0.1	0.1	0.2	0.1	0.5	0.01	0.02	0.02	1	0.01	0.001	0.5	0.5	0.01	0.5	0.001	20	0.01	0.001	0.01	0.1	0.1	0.02	0.02	5	0.1	0.02	0.1
Sample	Type
C2.3 0-1 cm	Lake Sediment	1.65	372.87	168.9	449	8210	63.7	24.9	1300	4.24	2009.3	3.8	2497.7	9.4	34.5	1.38	118.69	0.52	53	0.49	0.078	26.3	54.8	1.12	175.1	0.059	<20	2.08	0.025	0.34	1.5	6.3	0.26	0.11	190	0.9	0.05	7.7
C2.3 1-1.5 cm	Lake Sediment	1.44	363.68	160.01	455.9	3393	65.3	21.7	678	3.99	1961.5	3.6	2369.2	9	33	1.7	175.22	0.49	50	0.51	0.073	24.8	52.1	1.08	171.3	0.057	<20	1.96	0.024	0.32	1.4	6	0.29	0.15	175	0.9	0.05	7.2
C2.3 1.5-2 cm	Lake Sediment	1.42	367.59	159.29	441.7	3395	65.7	22.2	636	3.83	1334.4	3.5	2394.9	8.7	31.3	1.54	151.26	0.48	50	0.53	0.072	24.5	51.8	1.09	169.4	0.056	<20	1.98	0.024	0.31	1.4	5.9	0.27	0.17	210	0.8	0.05	7.1
C2.3 2-2.5 cm	Lake Sediment	1.43	356.93	149.06	410.8	3288	62.6	21.6	674	3.8	1496.8	3.4	2318.7	8.4	30.8	1.41	147.31	0.45	48	0.5	0.072	23.9	50.1	1.05	165	0.054	<20	1.89	0.023	0.3	1.4	5.7	0.25	0.17	199	0.8	0.05	6.9
C2.3 2.5-3 cm	Lake Sediment	1.32	351.89	137.5	374.7	3326	61.9	21.5	693	3.88	1852.7	3.4	2139.6	8.4	31.7	1.22	123.49	0.42	48	0.47	0.077	24.3	49.8	1.02	164.3	0.056	<20	1.87	0.023	0.3	1.4	5.6	0.25	0.15	175	0.8	0.05	6.9
C2.3 3-3.5 cm	Lake Sediment	1.46	366.66	149.88	416.8	3377	64.8	22.2	698	3.9	1536.9	3.4	2279	8.8	33.2	1.37	144.13	0.44	49	0.51	0.074	24.9	51.4	1.07	167.7	0.058	<20	1.99	0.024	0.32	1.4	6	0.26	0.17	187	0.8	0.04	7.2
C2.3 3.5-4 cm	Lake Sediment	1.5	380.38	175.55	478.3	3555	65.9	22.5	697	3.96	1573	3.4	2617.4	8.7	32.3	1.7	167.63	0.5	50	0.56	0.073	24.4	52.6	1.11	172.1	0.054	<20	1.98	0.024	0.3	1.4	6	0.27	0.2	213	0.8	0.06	7.1
C2.3 4-4.5 cm	Lake Sediment	1.5	417.01	190.64	507.1	3812	69	23.2	692	4.05	1657.5	3.2	2705.8	8.8	32.3	1.72	176.87	0.48	50	0.53	0.073	24.3	53.2	1.12	165.5	0.055	<20	2.01	0.025	0.3	1.4	6.1	0.26	0.2	232	0.9	0.06	7.2
C2.3 4.5-5 cm	Lake Sediment	1.42	489.2	195.41	527.3	4305	71.7	23.6	677	4.17	1753.8	3.2	2692	8.7	32.6	1.67	184.98	0.49	52	0.55	0.075	24.6	54.4	1.16	161.8	0.055	<20	2.03	0.025	0.31	1.6	6.2	0.26	0.21	248	0.9	0.07	7.4
C2.4 0-1 cm	Lake Sediment	1.51	355.41	159.84	431.6	5750	67.2	23.2	845	4.06	1646.1	3.5	2341.8	9.2	33	1.43	141.5	0.47	51	0.49	0.075	26.4	53.8	1.09	177.3	0.058	<20	2.09	0.026	0.34	1.3	6.1	0.27	0.14	206	0.9	0.04	7.4
C2.4 1-1.5 cm	Lake Sediment	1.46	429.58	185.29	487.9	4135	67.8	22.8	645	4.08	1802.8	3.3	2636.1	8.6	31.9	1.61	186.26	0.47	50	0.5	0.079	24.8	52.4	1.08	175.5	0.055	<20	1.98	0.023	0.32	1.4	6	0.27	0.18	229	0.9	0.06	7.1
C2.4 1.5-2 cm	Lake Sediment	1.45	397.96	168.65	440.9	3650	67.5	22.6	645	4.05	1888	3.3	2380.8	8.6	32.5	1.45	152.3	0.45	51	0.5	0.075	24.6	52.8	1.09	172.7	0.057	<20	2	0.024	0.32	1.7	6	0.27	0.18	199	0.8	0.05	7.2
C2.4 2-2.5 cm	Lake Sediment	1.41	381.43	171.35	500.6	3347	66.7	22.1	672	3.96	1538.9	3.2	2436	8.5	32	1.67	165.05	0.49	51	0.53	0.073	24.3	52.6	1.09	170.1	0.056	<20	1.98	0.024	0.31	1.4	6	0.27	0.18	213	0.9	0.06	7.1
C2.4 2.5-3 cm	Lake Sediment	1.47	382.67	169.7	472.4	3437	66.7	22.3	660	3.94	1475.3	3.3	2547.6	8.5	31.9	1.63	163.62	0.49	50	0.53	0.071	24.4	52.6	1.09	169.9	0.056	<20	1.99	0.023	0.31	1.4	6	0.27	0.19	211	0.8	0.06	7.1
C2.4 3-3.5 cm	Lake Sediment	1.44	397.09	175.7	493.7	3529	67.6	22.6	696	4.05	1564.6	3.2	2522.4	8.7	33.1	1.55	155.14	0.47	50	0.51	0.075	25.1	53.1	1.09	172.3	0.058	<20	2.01	0.026	0.31	1.5	6	0.26	0.18	219	0.8	0.06	7.2
C2.4 3.5-4 cm	Lake Sediment	1.46	457.18	179.19	503.8	3701	68.5	22.8	715	4.12	1706.2	3.1	2721.9	8.6	33.6	1.63	167.41	0.48	52	0.54	0.078	24.8	54.1	1.12	172.3	0.058	<20	2.04	0.024	0.31	1.6	6.2	0.27	0.19	245	0.8	0.05	7.3
C2.4 4-4.5 cm	Lake Sediment	1.46	423.88	172.38	467	3837	69.7	23.4	684	4.03	1604.3	3.2	2549.9	8.6	32.9	1.56	155.09	0.47	52	0.52	0.073	24.9	53.9	1.13	168.3	0.057	<20	2.01	0.025	0.32	1.6	6.1	0.27	0.19	205	0.8	0.06	7.3
C2.4 4.5-5 cm	Lake Sediment	1.42	442.02	180.64	473.9	4136	71.3	23.6	705	4.17	1748.3	3.3	2557.7	8.8	33.9	1.55	156.68	0.47	53	0.52	0.077	25.8	55.4	1.15	173.3	0.058	<20	2.06	0.026	0.32	1.9	6.3	0.27	0.19	220	0.9	0.05	7.5
C2.1 0-3 cm	Lake Sediment	4.02	31.08	25.62	106.7	2598	25	6.5	203	0.94	805.5	7.4	429.6	0.8	37.8	0.42	11.09	0.14	14	0.96	0.095	8.6	19.1	0.35	51.1	0.014	<20	0.6	0.027	0.2	0.4	1.2	0.08	1.36	257	0.8	0.03	1.8
C2.2 0-3 cm	Lake Sediment	4.01	30.23	27.2	109.9	2513	23.9	6	151	1	838.1	7.2	366.6	0.8	35.8	0.42	13.72	0.14	14	0.9	0.088	8.5	18	0.33	50.3	0.014	<20	0.57	0.026	0.23	0.4	1.1	0.1	1.42	281	0.8	0.03	1.8
PACS-2A	Lake Sediment	4.66	304.85	158.93	331	1038	33	9	247	3.07	23.9	1.5	8	1.8	67.8	1.99	5.41	0.3	74	0.74	0.082	7.7	49.9	0.96	327	0.102	41	1.67	1.772	0.29	0.2	5.1	0.42	1.25	2912	1.1	0.04	5.1
PACS-2B	Lake Sediment	4.59	298.22	157.61	320.8	1044	32	8.6	240	2.99	23.5	1.5	10.6	1.8	65.2	1.93	5.71	0.3	72	0.72	0.08	7.5	49.2	0.94	310.8	0.1	42	1.61	1.728	0.29	0.2	5	0.4	1.21	2762	1	0.04	5
Pulp Duplicates
C2.3 1-1.5 cm	Lake Sediment	1.44	363.68	160.01	455.9	3393	65.3	21.7	678	3.99	1961.5	3.6	2369.2	9	33	1.7	175.22	0.49	50	0.51	0.073	24.8	52.1	1.08	171.3	0.057	<20	1.96	0.024	0.32	1.4	6	0.29	0.15	175	0.9	0.05	7.2
C2.3 1-1.5 cm	REP	1.39	359.53	157.96	449.1	3325	64.6	21.4	662	3.94	1934.1	3.5	2314.1	8.8	32.3	1.69	170.9	0.49	50	0.51	0.073	24.7	51.5	1.06	168.9	0.056	<20	1.96	0.023	0.31	1.5	5.9	0.28	0.15	200	0.9	0.05	7.1
Reference Materials
STD DS11	STD	14.98	147.59	135.35	335	1804	83	14	1034	3.1	43.2	2.4	98.2	7.3	64	2.26	7.02	10.85	48	1.05	0.069	16.7	58.7	0.85	400.6	0.088	<20	1.15	0.071	0.4	2.9	3.1	5.15	0.27	307	2.2	4.62	5.2
STD OREAS262	STD	0.67	117.38	54.28	148.2	454	67.4	27.2	537	3.23	35.4	1.2	66.5	8.9	34.1	0.6	2.21	0.92	22	2.98	0.038	15	43	1.17	243.1	0.003	<20	1.31	0.066	0.3	<0.1	3.1	0.48	0.26	164	0.5	0.23	4.1
STD DS11	STD	14.69	149.35	129.9	329.6	1418	83.5	13.2	988	3.07	42.6	2.2	47.5	6.6	61.8	2	5.87	9.96	45	1.03	0.065	16.9	58.9	0.84	368.2	0.091	<20	1.13	0.07	0.39	2.8	3	5.06	0.26	262	2.3	4.51	5.2
STD OREAS262	STD	0.67	115.58	53.73	143.3	445	67.4	27.1	529	3.22	35.8	1.1	67.3	8.5	34.2	0.57	2.77	0.88	20	3.11	0.035	14.7	42	1.17	235.3	0.003	<20	1.19	0.065	0.3	0.1	3	0.49	0.25	170	0.5	0.23	4.2
STD BVGEO01	STD	10.62	4343.05	178.79	1830.8	2496	156.2	25.1	724	3.68	118.4	3.5	208.8	13.3	54.7	5.69	2.22	22.92	71	1.38	0.07	25.4	177.1	1.32	326.1	0.246	<20	2.31	0.188	0.9	3.6	5.8	0.66	0.64	103	4.8	1.03	7.9
STD OREAS262	STD	0.67	113.26	52.21	144.3	432	67.2	26.8	517	3.16	35.8	1.1	66	8.2	33	0.55	2.17	0.85	20	3.06	0.036	13.5	40.3	1.16	230.4	0.003	<20	1.21	0.064	0.3	0.1	3	0.51	0.24	179	0.5	0.23	4.1
BLK	BLK	<0.01	<0.01	0.02	<0.1	<2	<0.1	<0.1	<1	<0.01	<0.1	<0.1	<0.2	<0.1	<0.5	<0.01	<0.02	<0.02	<1	<0.01	<0.001	<0.5	<0.5	<0.01	<0.5	<0.001	<20	<0.01	<0.001	<0.01	<0.1	<0.1	<0.02	<0.02	6	<0.1	<0.02	<0.1
BLK	BLK	<0.01	<0.01	0.02	<0.1	<2	<0.1	<0.1	<1	<0.01	<0.1	<0.1	<0.2	<0.1	<0.5	<0.01	<0.02	<0.02	<1	<0.01	<0.001	<0.5	<0.5	<0.01	<0.5	<0.001	<20	<0.01	<0.001	<0.01	<0.1	<0.1	<0.02	<0.02	<5	<0.1	<0.02	<0.1
BLK	BLK	<0.01	0.02	0.03	<0.1	<2	<0.1	<0.1	<1	<0.01	0.2	<0.1	<0.2	<0.1	<0.5	<0.01	<0.02	<0.02	<1	<0.01	<0.001	<0.5	<0.5	<0.01	<0.5	<0.001	<20	<0.01	<0.001	<0.01	<0.1	<0.1	<0.02	<0.02	<5	<0.1	<0.02	<0.1
Summary Table of Sediment Metal(loid) Concentrations in the Experimental Cores
		Yellowknife Bay				Lower Martin Lake
	Units	Mean	SD	SE	N	Mean	STD	SE	N
Arsenic	µg/g	1675	180	43	18	822	23	16	2
Iron	% weight	4.02	0.1	0.03	18	1	0.04	0.03	2
Manganese	mg/g	723	151	36	18	203	37	26	2
Sulfur	% weight	0.2	0.02	0.01	18	1.4	0.04	0.03	2
